# Supplementary material for: Inhibition of protein disulfide isomerase in glioblastoma causes marked downregulation of DNA repair and DNA damage response genes
Source: PubMed Central journal article supplement — Theranostics. 2019 Apr 12;9(8):2282–98. doi: 10.7150/thno.30621 (PMC6531306; doi:10.7150/thno.30621), 2019-04-12
Supplement: thnov09p2282s1.pdf [file thnov09p2282s1.pdf]

**Fig. S1**

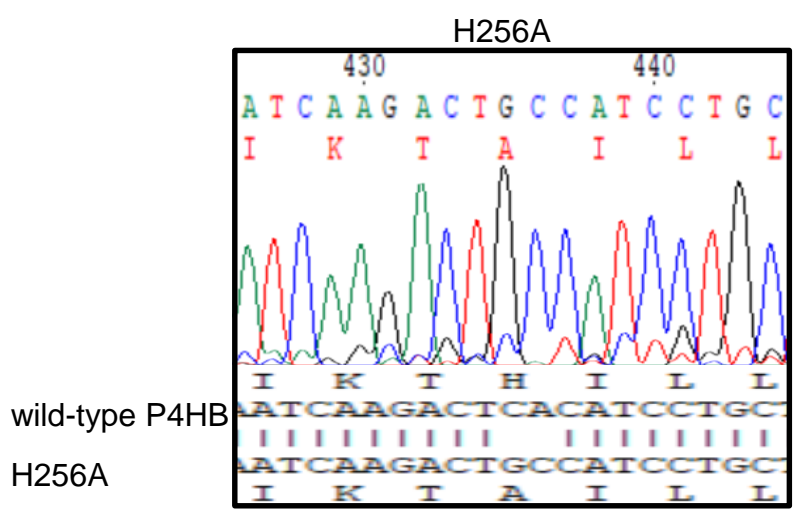

**Supplementary Figure S1.** Chromatogram confirming point mutation in tested PDI mutant.

**Fig. S2**

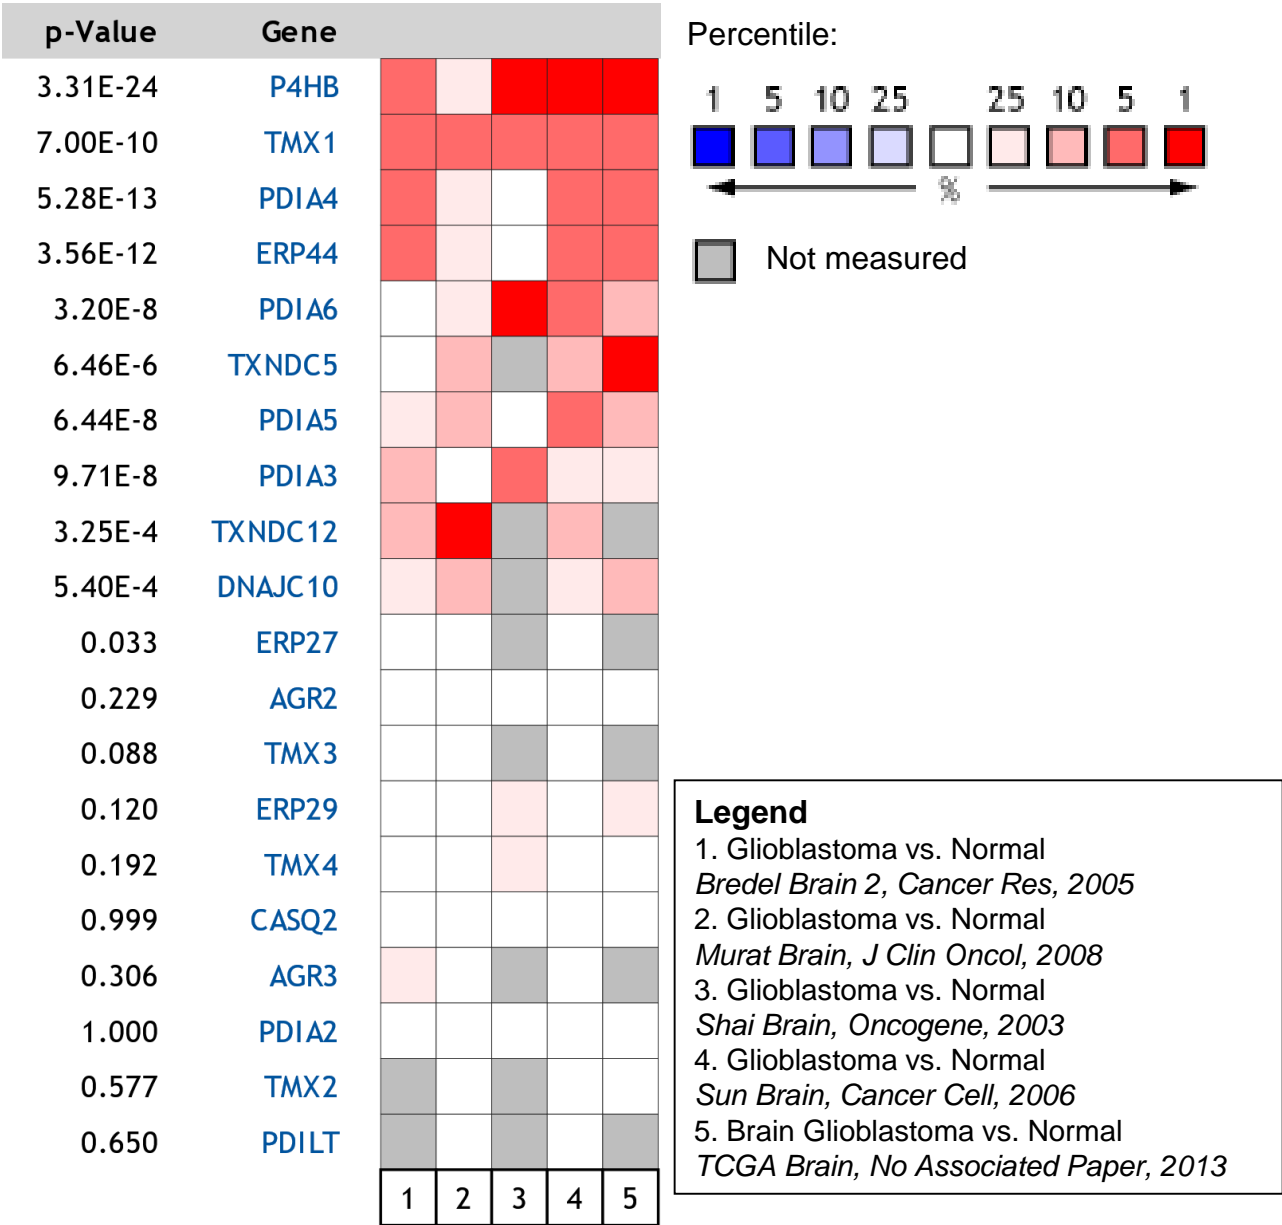

**Supplementary Figure S2.** mRNA expression of PDI isoforms in five GBM datasets from the Oncomine Platform ([www.oncomine.org](http://www.oncomine.org)). The p-Value for a gene is its p-Value for the median-ranked analysis. Cell color is determined by the best gene rank percentile for the analyses within the cell.

**Fig. S3**

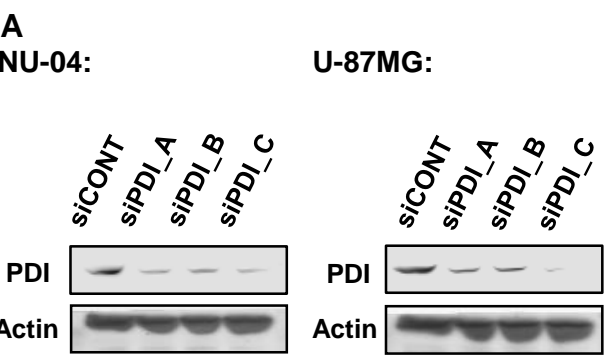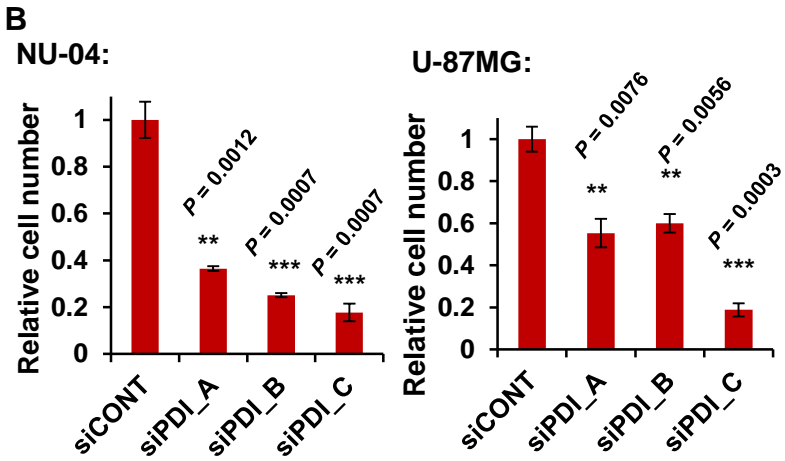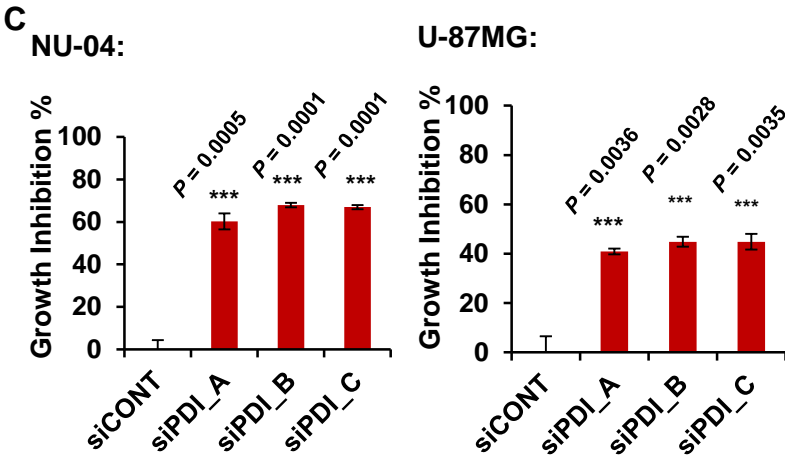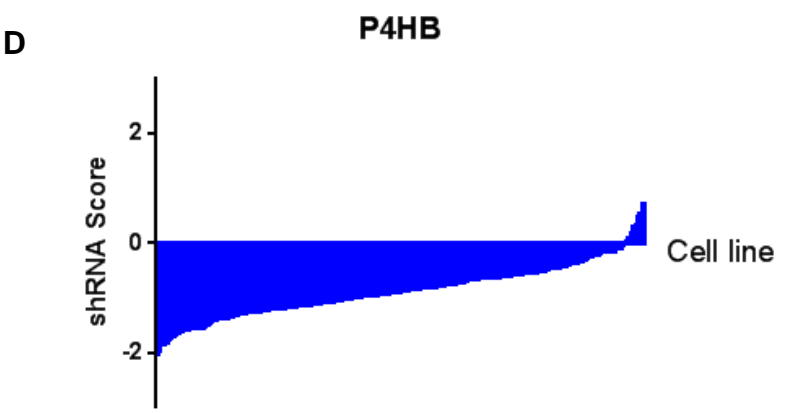

**Supplementary Figure S3.** PDI drives GBM progression and PDI knockdown inhibits cell proliferation. (a) PDI knockdown 72 h after PDI siRNA transfection in NU04 and U87MG cells. (b) Cell numbers counted under microscope and (c) cell growth and viability determined by the MTT assay were both significantly decreased. \*  $p < 0.05$ ; \*\*  $p < 0.01$ ; \*\*\*  $p < 0.0001$ . (d) Waterfall plots of shRNA activities in a panel of cancer cell lines. shRNA score denotes the log<sub>2</sub>-based decrease in PDI shRNA compared to pooled shRNA in 1002 cancer cell lines after several rounds of proliferation post-shRNA infection. A negative shRNA score indicates decreased cancer cell proliferation/survival after shRNA transfection.

**Fig. S4**

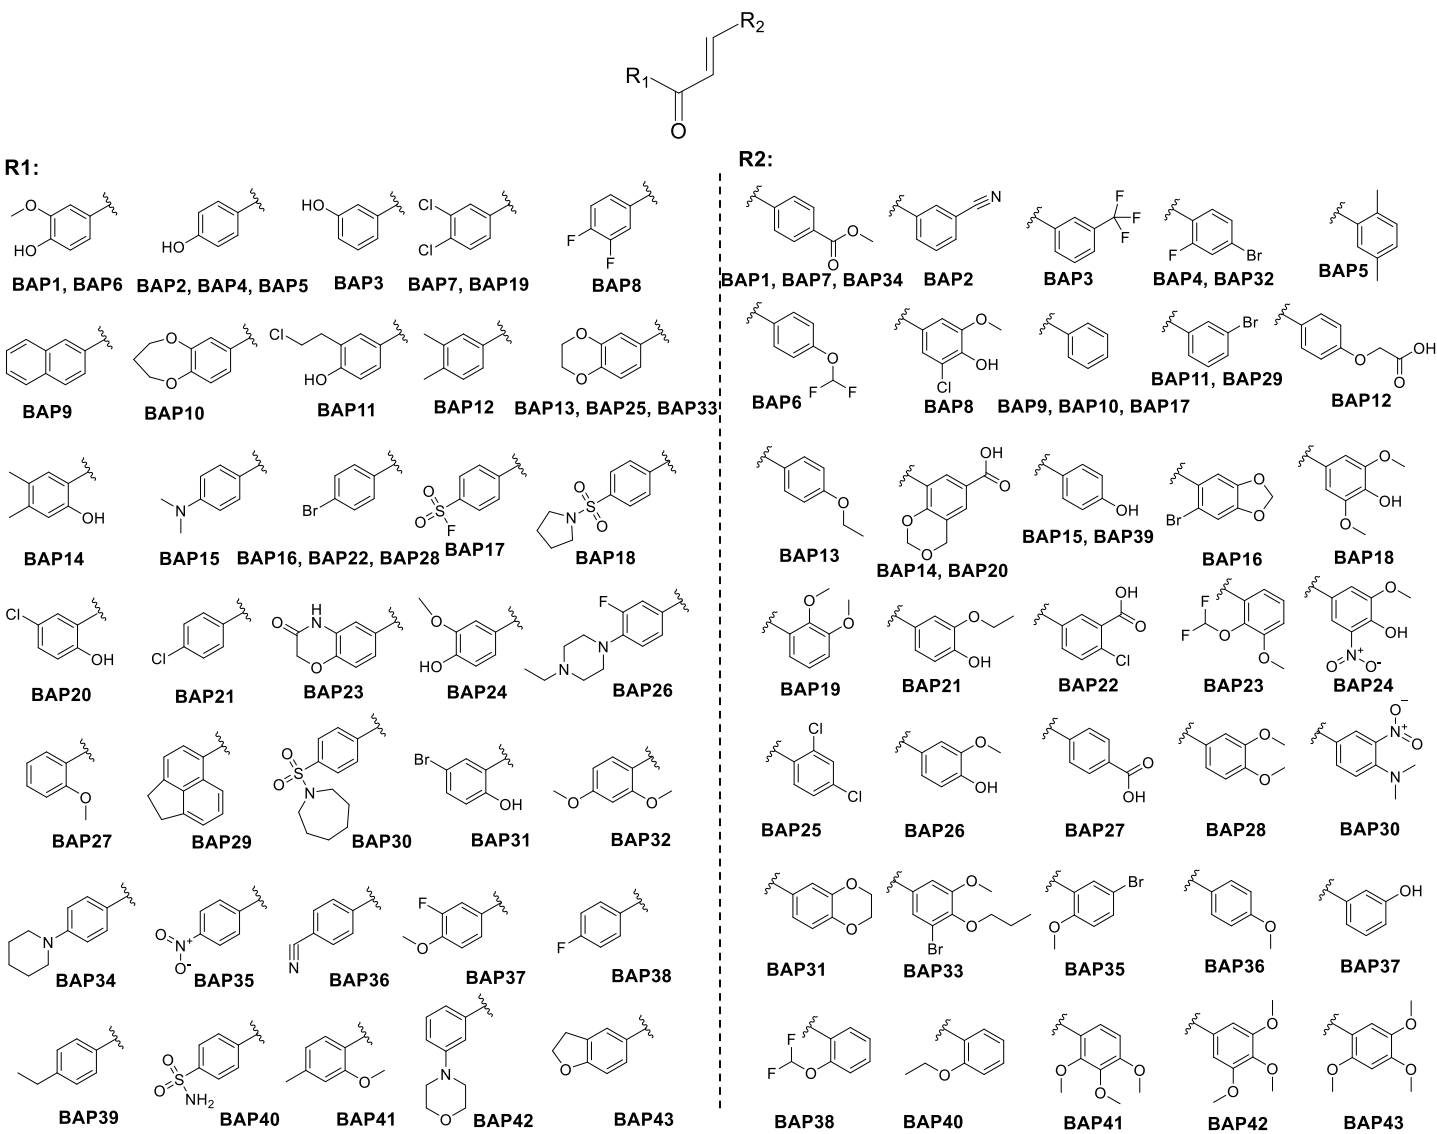

**Supplementary Figure S4.** Chemical structures of the chalcone derivatives.

**Fig. S5**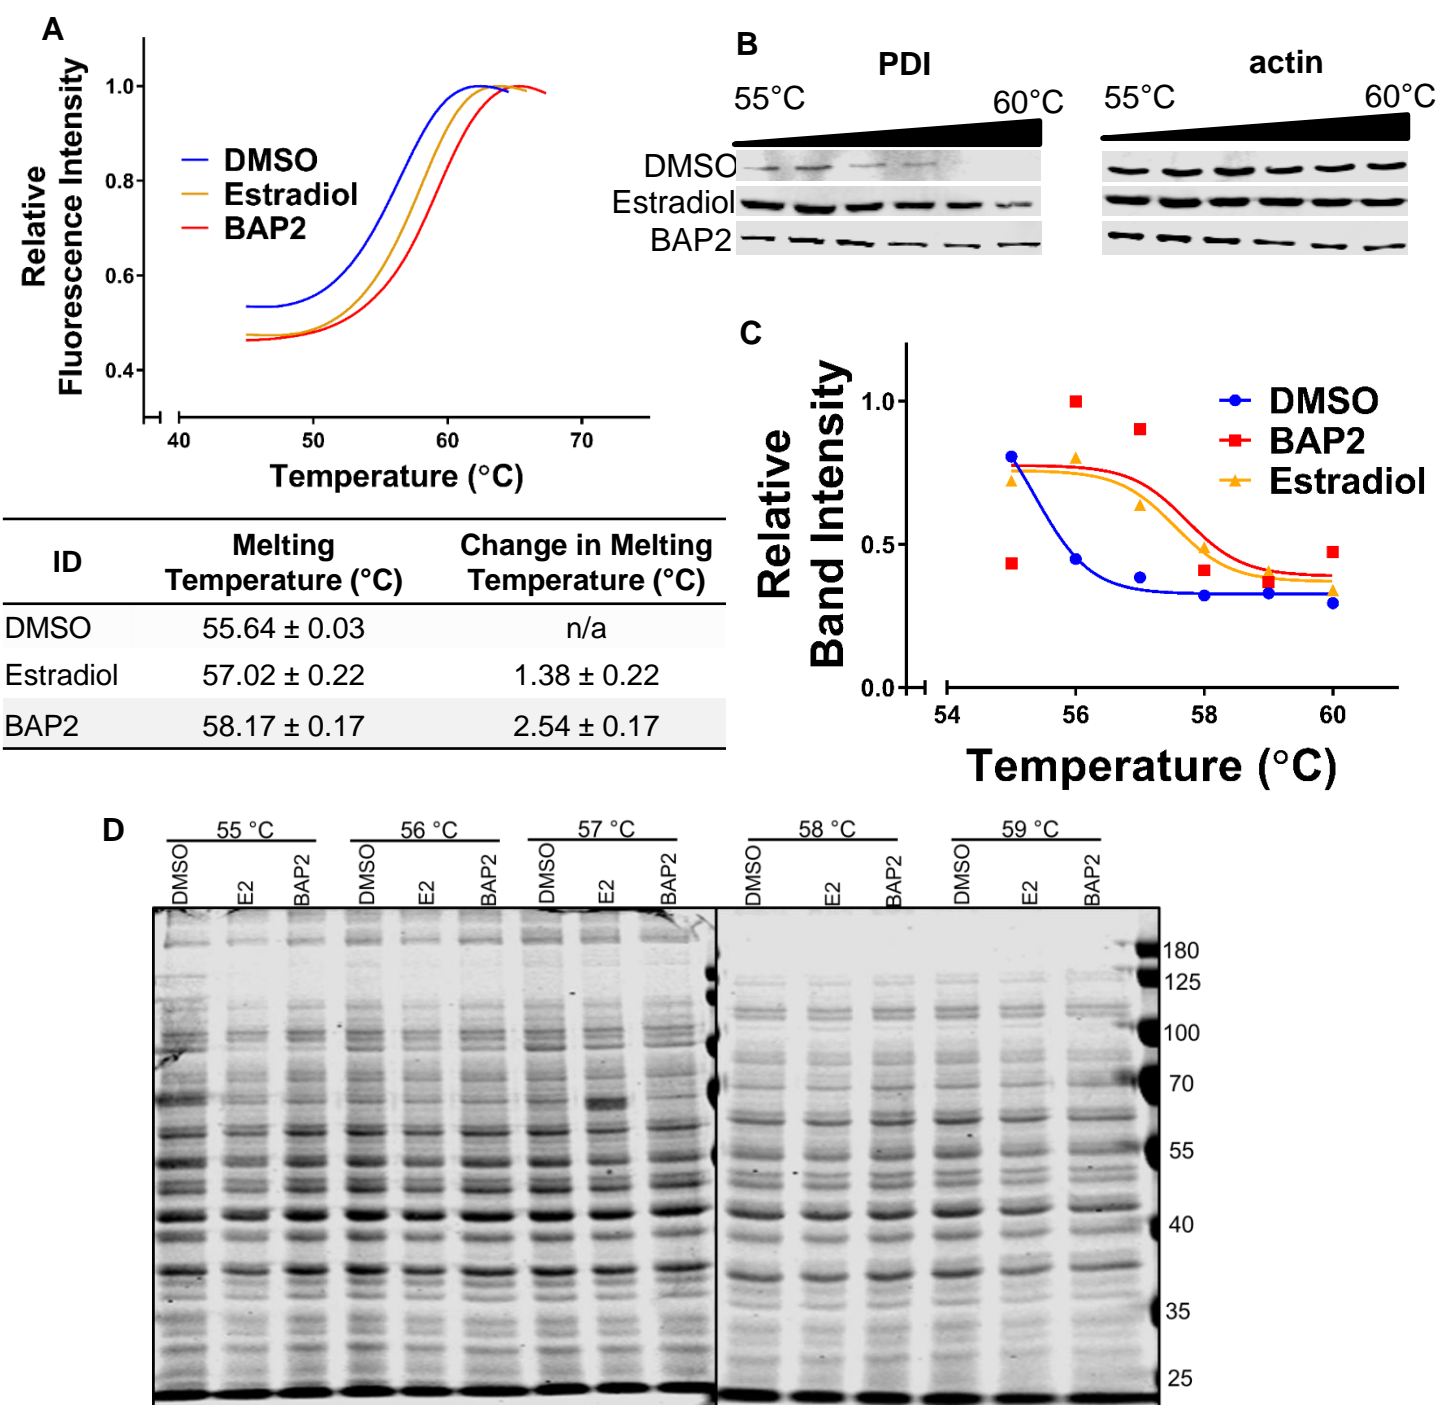

**Supplementary Figure S5. BAP2 stabilizes intracellular PDI to thermal degradation.** (a) Melt curve and Boltzmann melting temperature of PDI in the presence of DMSO (2.5%), estradiol (100 μM), or **BAP2** (100 μM). Experiment was repeated in triplicate. (b, c) PDI stability in the presence of 100 μM estradiol, 100 μM **BAP2**, or DMSO as a negative control. CETSA was performed in U87MG cells and cell lysate samples were probed by Western blotting with anti-PDI and actin antibodies. Actin was used as a loading control. (d) Coomassie-stained 10% acrylamide gel of intact A172 cells treated with DMSO, 100 μM estradiol (E2), or 100 μM **BAP2** and subjected to heat at indicated temperatures.

**Fig. S6**

**A**

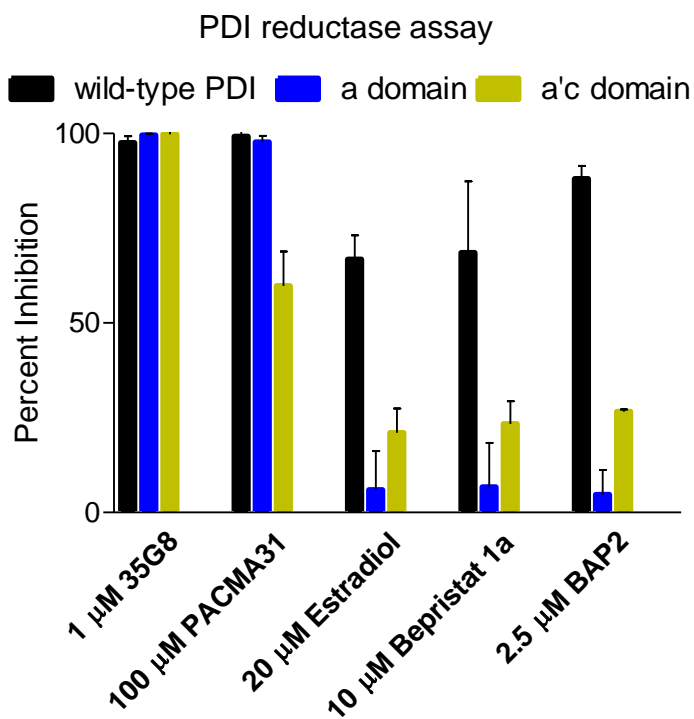

**B**

PDI reductase assay

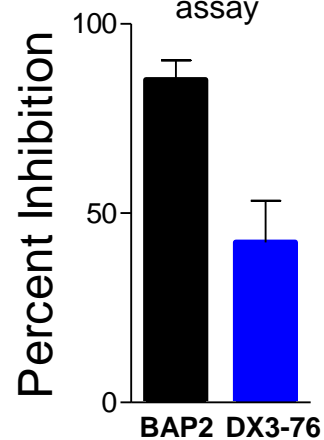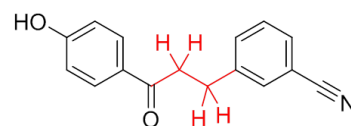

**DX3-76**

**Supplementary Figure S6.** Activity of PDI inhibitors in the PDI reductase assay. (a) Percent inhibition of reductase activity of PDI or isolated **a** or **a'c** domains (1.6  $\mu\text{M}$ ) in the presence of inhibitors compared to DMSO control. (b) Percent inhibition of **BAP2** (100  $\mu\text{M}$ ) and saturated analog, **DX3-76** (100  $\mu\text{M}$ ), against wild-type PDI in the PDI reductase assay. Data expressed as means  $\pm$  S.D. (n = 3).

Fig. S7

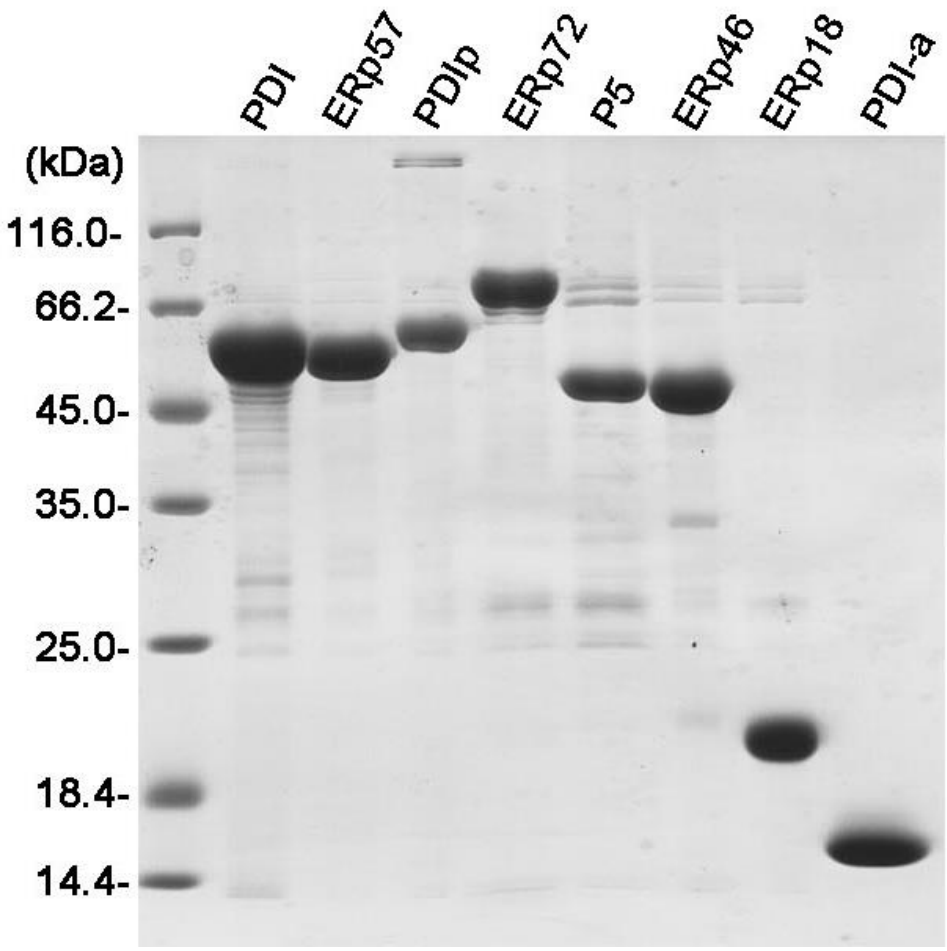

**Supplementary Figure S7.** Expression and purification of PDI family enzymes and the **a** domain of PDI. All the recombinant proteins contain an N-terminal His tag, and were purified using a nickel-nitrilotriacetic acid column, examined by 12% SDS-PAGE.

Fig. S8

A

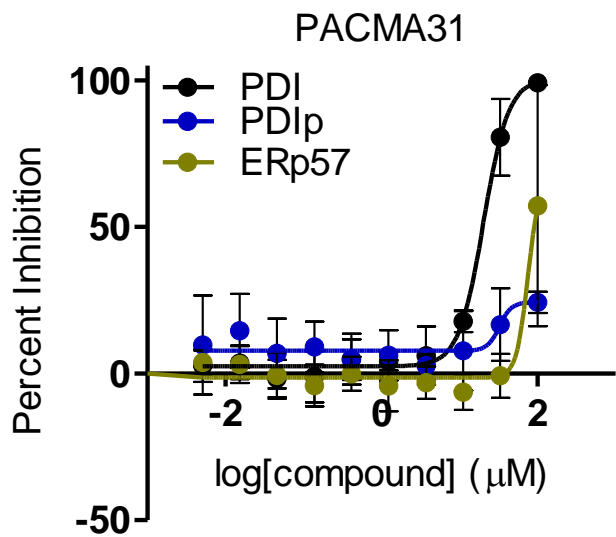

B

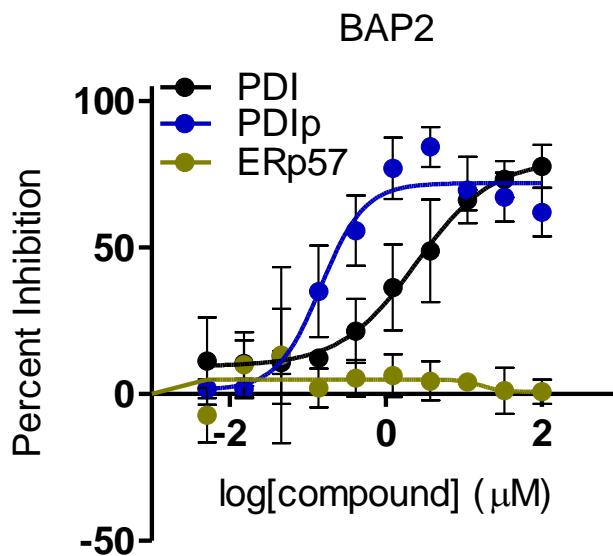

**Supplementary Figure S8.** Activity of PDI inhibitors **PACMA31** (a) and **BAP2** (b) against PDI, PDIp, and Erp57 in the PDI reductase assay. PDI was tested at 0.4  $\mu\text{M}$ , PDIp was tested at 0.8  $\mu\text{M}$  and ERp57 was tested at 1.6  $\mu\text{M}$ . Data expressed as mean  $\pm$  S.D. ( $n = 3$ ).



Fig. S9

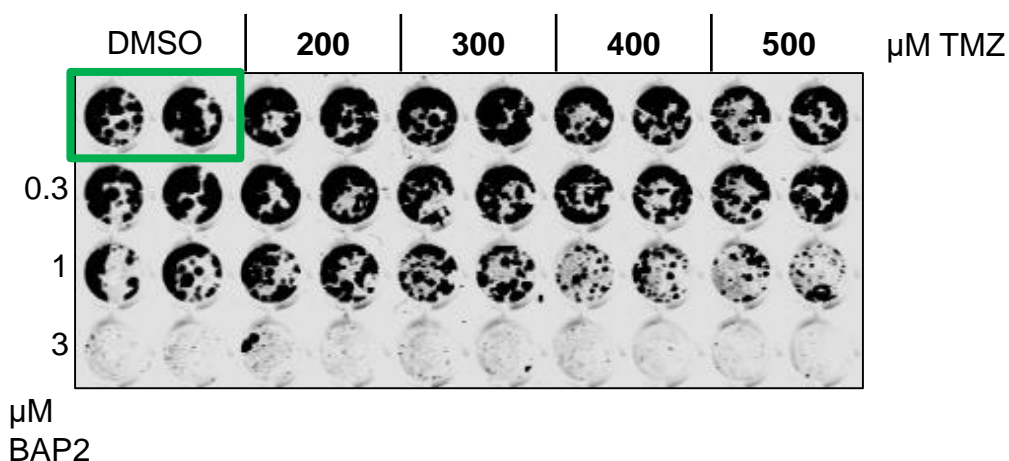

**Supplementary Figure S9.** Colony formation assay of TMZ and **BAP2** in combination in HCT116 cells. Cells treated for 7 days before staining. Result is representative of three independent experiments.

**Fig. S10**

**A**

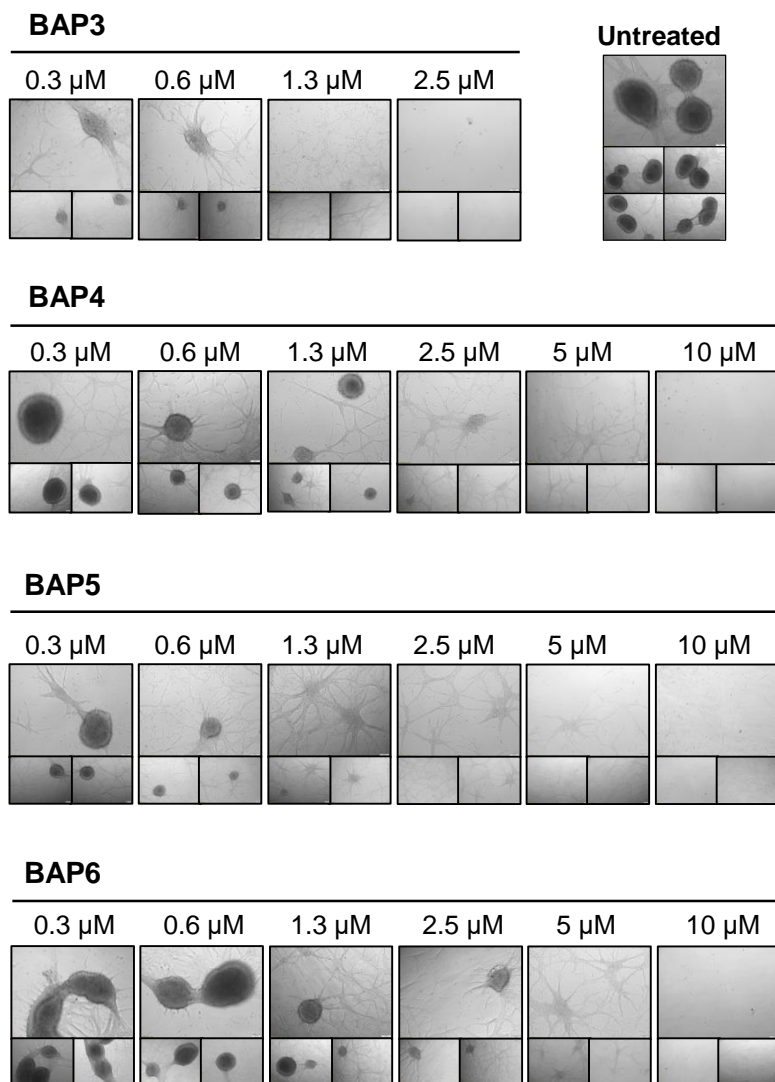

**B**

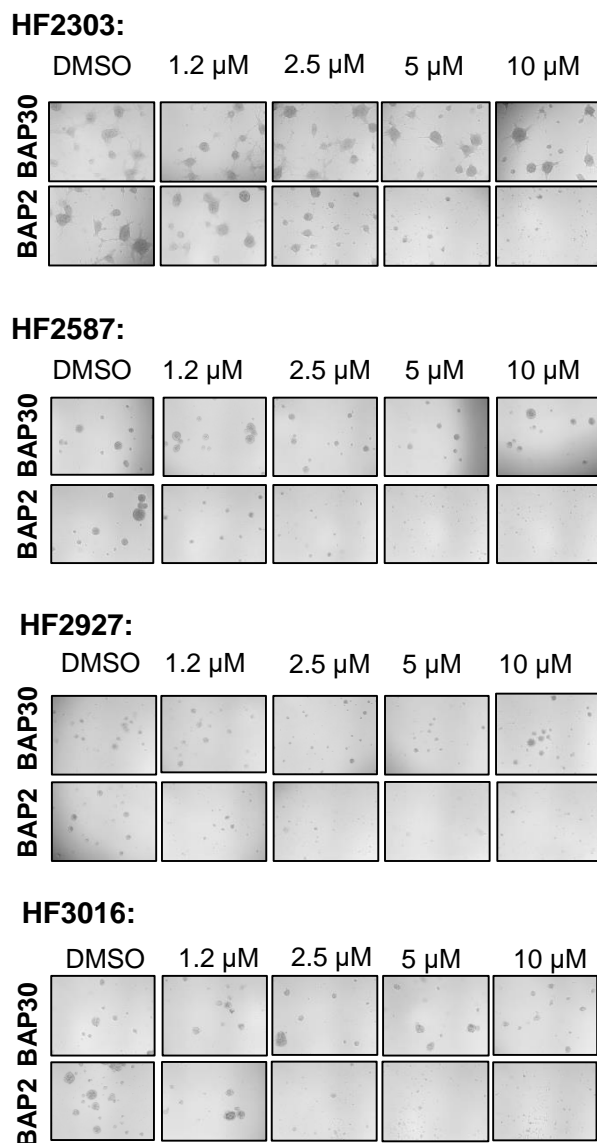

**Supplementary Figure S10.** Active chalcone derivatives inhibit the neurosphere formation in GBM cells. (a) **BAP2** analogues inhibit neurosphere formation in a dose-dependent manner in U87MG cells. Cells were exposed to chalcones for 24 h, and allowed to form neurospheres in fresh medium. Three representative images are shown for each condition ten days after the drug treatment. (b) **BAP2** impaired neurosphere formation in HF2303, HF2587, HF2927, and HF3016 GBM cells, whereas the inactive **BAP30** showed no significant inhibition. Cells were treated with **BAP2** or **BAP30** at indicated concentrations for 24 h. Representative images show sphere formation in the indicated conditions seven days after drug treatment.

Fig. S11

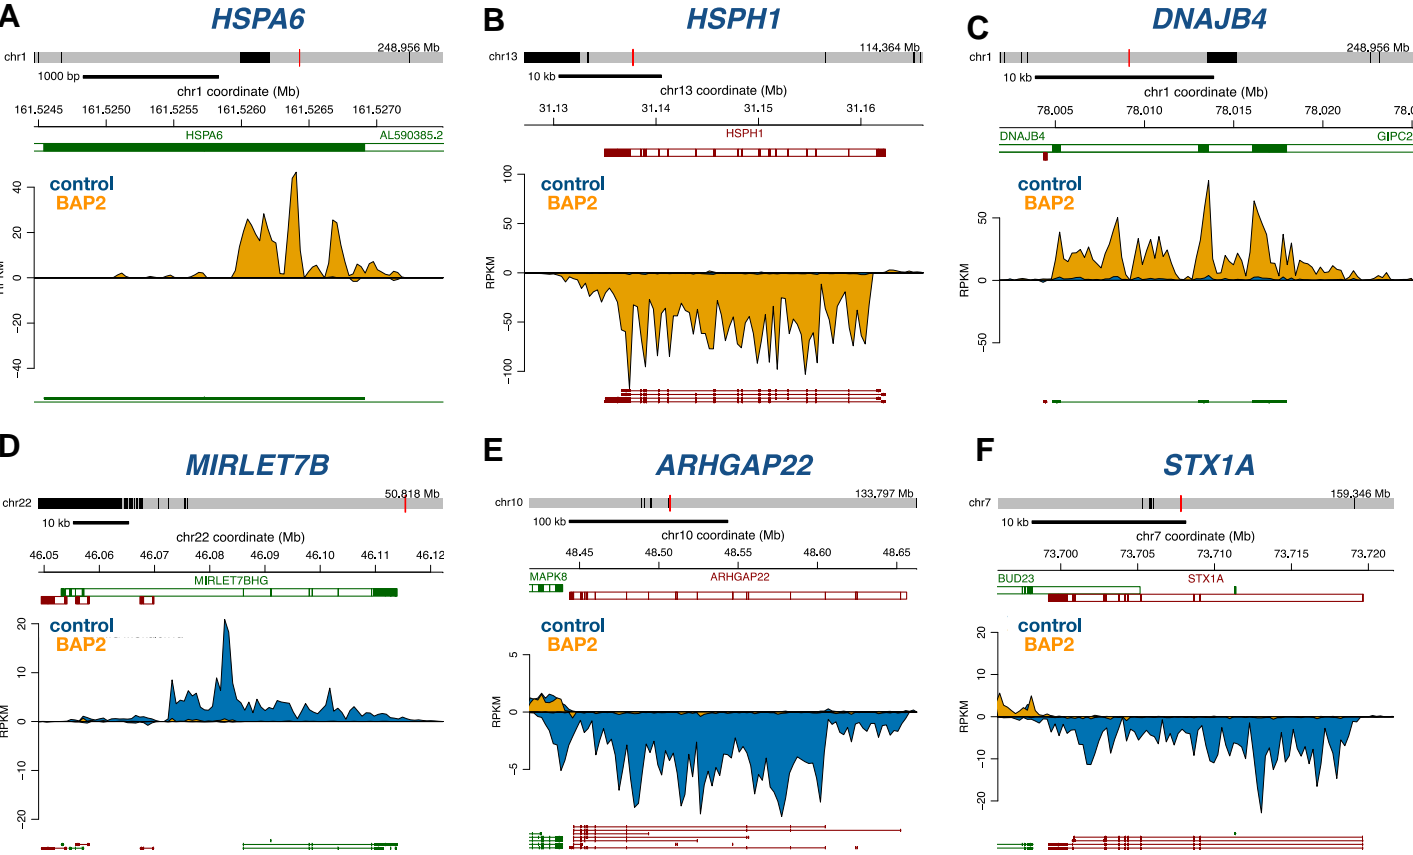

**Supplementary Figure S11. BAP2 increases expression of genes involved in UPR. BAP2 significantly upregulates *HSPA6* (a), *HSPH1* (b), and *DNAJB4* (c) expression. BAP2 significantly downregulates *MIRLET7B* (d), *ARHGAP22* (e), and *STX1A* (f) expression levels.**

Fig. S12

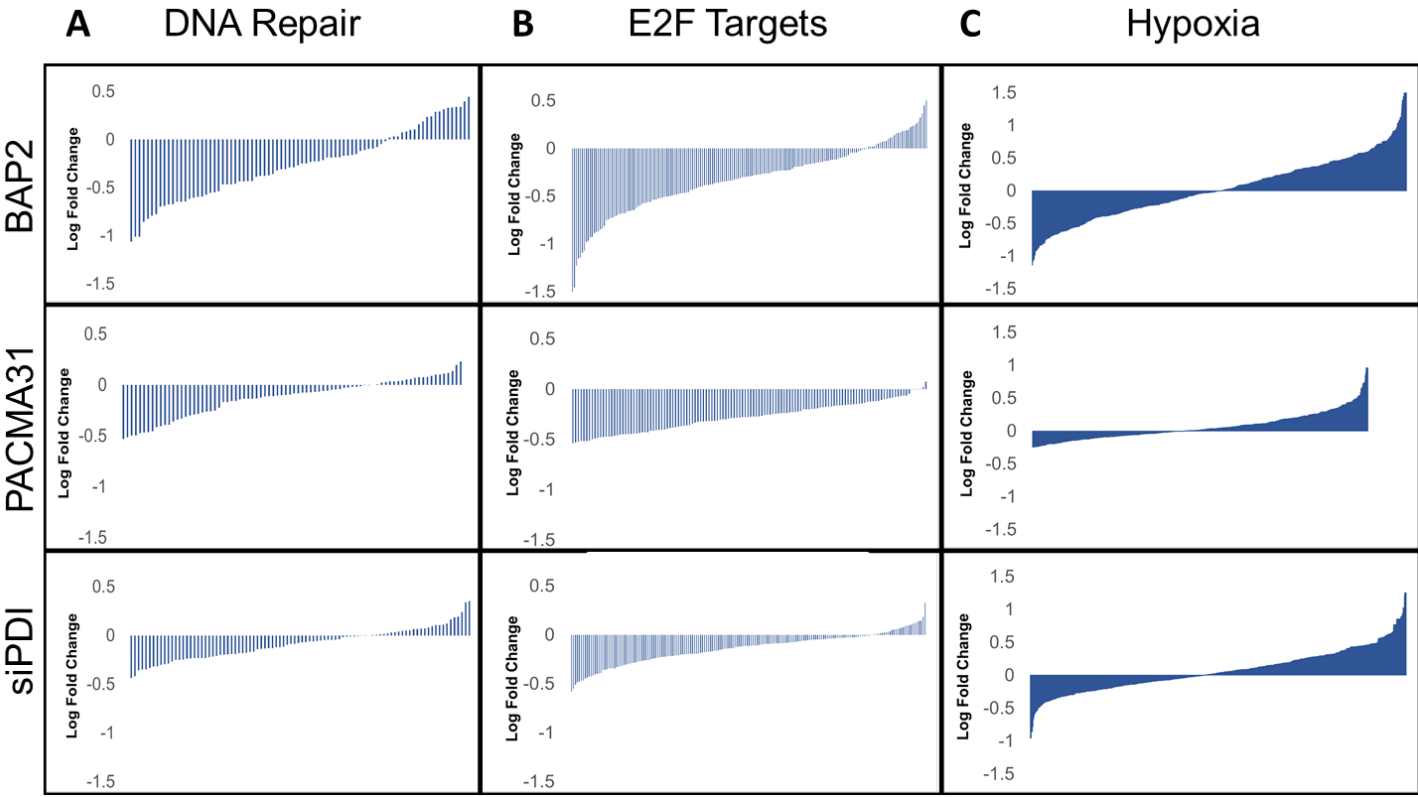

**Supplementary Figure S12.** Inhibition of PDI in GBM causes downregulation of DNA repair genes and E2F targets and promotes a hypoxic response. Waterfall plots of DNA repair (a), E2F target (b), and hypoxia (c) gene transcription in response to PDI inhibition by **BAP2**, **PACMA31**, and siRNA-mediated knockdown in U87MG cells.

**Fig. S13**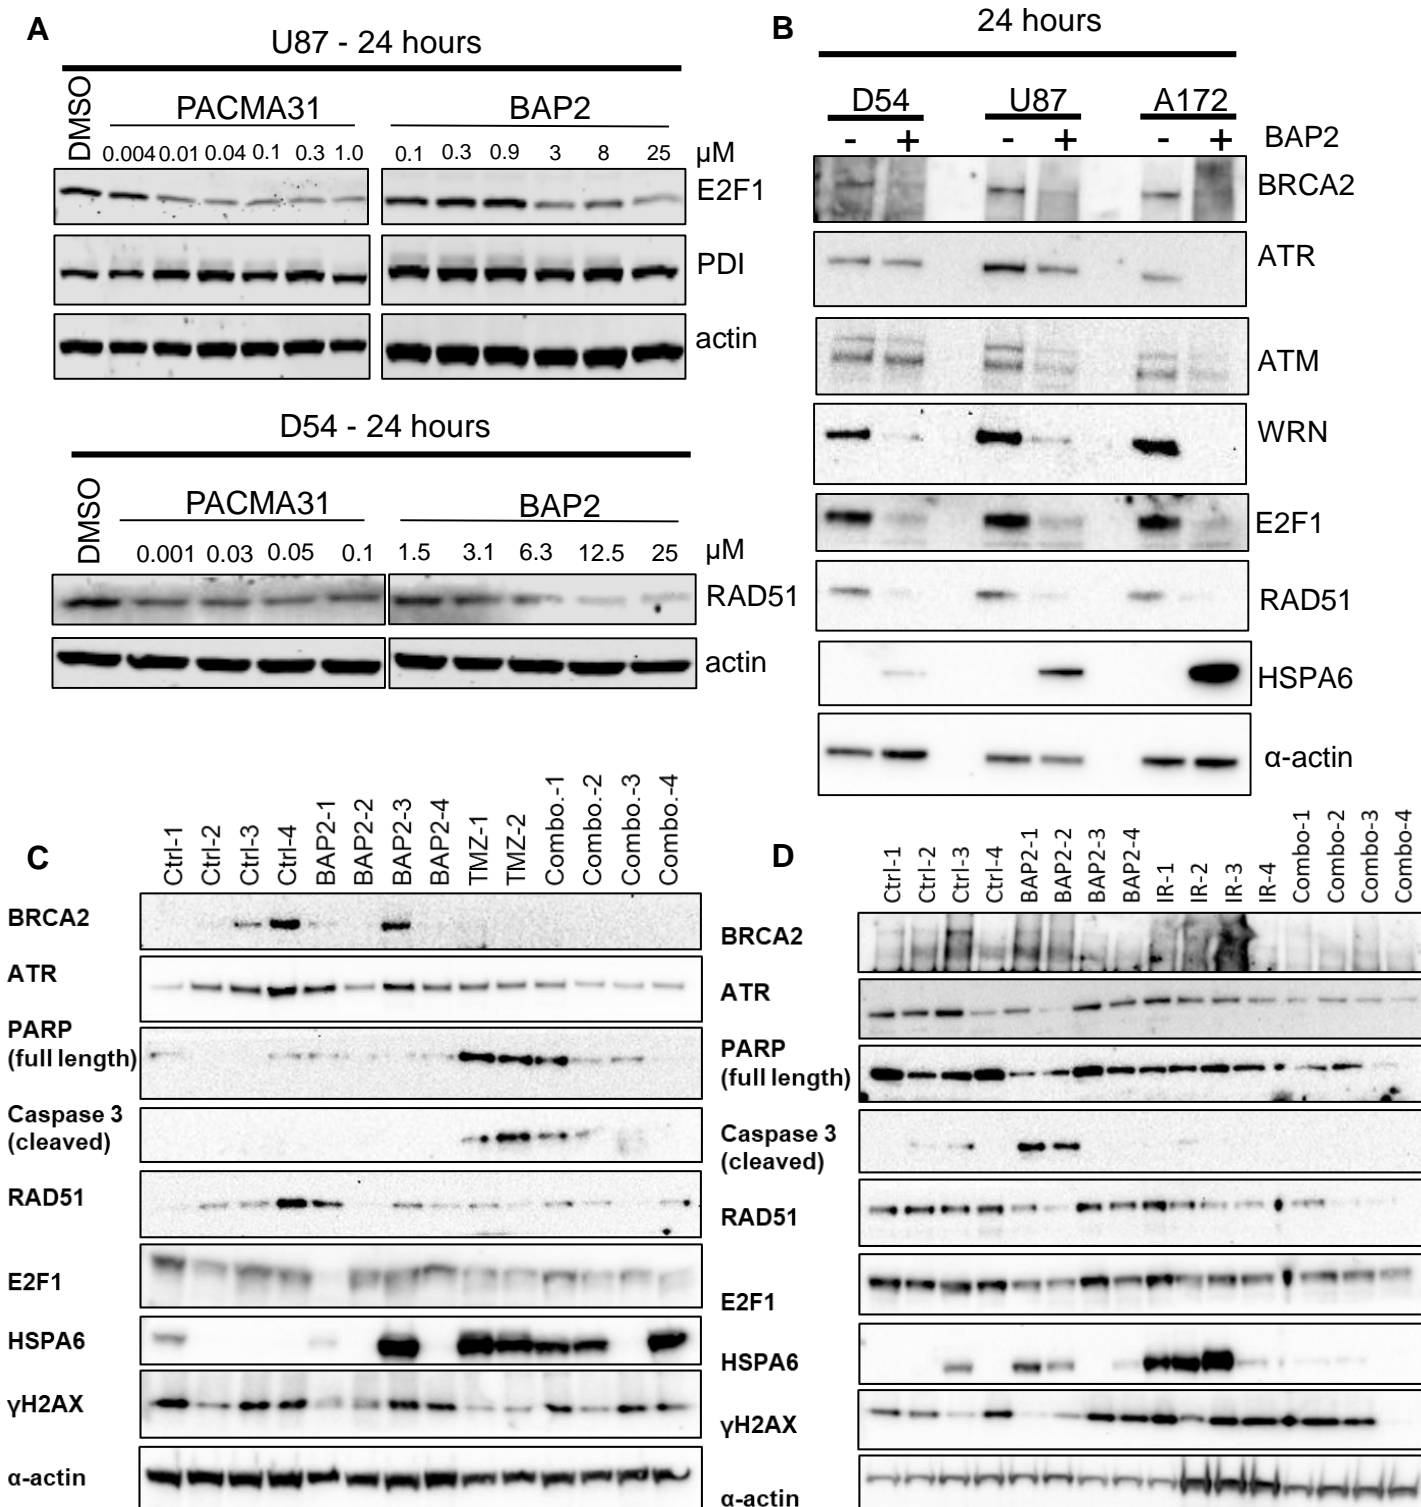

**Supplementary Figure S13.** PDI inhibitors decrease the expression of DNA damage markers and DNA repair genes. (a) U87MG or D54 cells were treated with DMSO, **PACMA31**, or **BAP2** at indicated doses for 24 hours. (b) D54, U87, and A172 cells were treated with DMSO or **BAP2** at 15  $\mu\text{M}$  (D54 and A172) or 30  $\mu\text{M}$  (U87MG) for 24 hours. (c) Western blot of mouse tissue from *in vivo* experiment. Conditions: BL030216 U87MG xenografts with TMZ (5mg/kg, 5 days/wk, oral); **BAP2** (20mg/kg, 5 days/wk, i.p. injection in 5% DMSO / 65% 1,2-Propanediol / 30% saline); vehicle control (i.p. saline) for 2 weeks. (d) Western blot of mouse tissue from *in vivo* experiment. Conditions: BL062216 D54MG xenografts with IR (2Gy/day, 5 days a week); **BAP2** (20mg/kg, 5 days/wk, i.p. injection in 5% DMSO / 65% 1,2-Propanediol / 30% saline); vehicle control (i.p. saline) for 2 weeks.

**Table S1.** Biological activities and molecular properties of inactive chalcone derivatives studied in the present study

| Chalcone     | IC <sub>50</sub> <sup>a</sup> (μM) | MW     | No. Rotatable Bonds | No. H Donors | No. H Acceptors | LogP | PSA    |
|--------------|------------------------------------|--------|---------------------|--------------|-----------------|------|--------|
| <b>BAP1</b>  | 0.83 ± 0.20 <sup>b</sup>           | 312.32 | 6                   | 1            | 5               | 3.30 | 72.83  |
| <b>BAP2</b>  | 0.93 ± 0.09                        | 249.26 | 3                   | 1            | 3               | 3.34 | 61.09  |
| <b>BAP3</b>  | 0.97 ± 0.12                        | 292.25 | 4                   | 1            | 2               | 4.40 | 37.29  |
| <b>BAP4</b>  | 1.07 ± 0.12                        | 321.14 | 3                   | 1            | 2               | 4.41 | 37.29  |
| <b>BAP5</b>  | 1.97 ± 0.12                        | 252.31 | 3                   | 1            | 2               | 4.43 | 37.29  |
| <b>BAP7</b>  | 5.20 ± 0.97                        | 335.18 | 5                   | 0            | 3               | 4.89 | 43.37  |
| <b>BAP8</b>  | 6.52 ± 1.38                        | 324.71 | 4                   | 1            | 3               | 4.52 | 46.53  |
| <b>BAP9</b>  | 8.40 ± 0.69                        | 258.31 | 3                   | 0            | 1               | 4.61 | 17.07  |
| <b>BAP10</b> | 24                                 | 280.32 | 3                   | 0            | 3               | 3.55 | 35.53  |
| <b>BAP11</b> | 32                                 | 365.65 | 5                   | 1            | 2               | 5.13 | 37.29  |
| <b>BAP12</b> | 39                                 | 310.34 | 6                   | 1            | 4               | 4.14 | 63.60  |
| <b>BAP13</b> | 52                                 | 310.34 | 5                   | 0            | 4               | 3.82 | 44.76  |
| <b>BAP14</b> | 64                                 | 354.35 | 4                   | 2            | 6               | 3.65 | 93.06  |
| <b>BAP15</b> | 64                                 | 267.32 | 4                   | 1            | 3               | 3.62 | 40.54  |
| <b>BAP16</b> | 66                                 | 410.06 | 3                   | 0            | 3               | 4.97 | 35.53  |
| <b>BAP17</b> | 66                                 | 290.31 | 4                   | 0            | 3               | 3.32 | 59.59  |
| <b>BAP18</b> | 74                                 | 417.48 | 7                   | 1            | 6               | 3.01 | 101.52 |
| <b>BAP19</b> | 78                                 | 337.20 | 5                   | 0            | 3               | 5.00 | 35.53  |
| <b>BAP20</b> | 79                                 | 360.75 | 4                   | 2            | 6               | 3.34 | 93.06  |
| <b>BAP21</b> | 88                                 | 302.75 | 5                   | 1            | 3               | 4.46 | 46.53  |
| <b>BAP22</b> | 90                                 | 366.59 | 4                   | 0            | 3               | 5.01 | 62.89  |
| <b>BAP23</b> | 96                                 | 375.32 | 6                   | 1            | 5               | 3.28 | 73.86  |
| <b>BAP24</b> | 98                                 | 345.30 | 6                   | 2            | 7               | 3.08 | 121.81 |
| <b>BAP25</b> | > 10                               | 335.18 | 3                   | 0            | 3               | 4.82 | 35.53  |
| <b>BAP26</b> | > 10                               | 384.44 | 6                   | 1            | 5               | 4.12 | 53.01  |
| <b>BAP27</b> | > 10                               | 282.29 | 5                   | 1            | 4               | 3.32 | 63.60  |
| <b>BAP28</b> | > 100                              | 347.20 | 5                   | 0            | 3               | 4.42 | 35.53  |
| <b>BAP29</b> | > 100                              | 363.25 | 3                   | 0            | 1               | 5.96 | 17.07  |
| <b>BAP30</b> | > 100                              | 457.54 | 7                   | 0            | 6               | 4.25 | 111.89 |
| <b>BAP31</b> | > 100                              | 361.19 | 3                   | 1            | 4               | 3.99 | 55.76  |
| <b>BAP32</b> | > 100                              | 365.19 | 5                   | 0            | 3               | 4.62 | 35.53  |
| <b>BAP33</b> | > 100                              | 433.29 | 7                   | 0            | 5               | 5.08 | 53.99  |
| <b>BAP34</b> | > 100                              | 349.42 | 6                   | 0            | 4               | 4.64 | 46.61  |
| <b>BAP35</b> | > 100                              | 362.17 | 5                   | 0            | 4               | 4.33 | 72.12  |
| <b>BAP36</b> | > 100                              | 263.29 | 4                   | 0            | 3               | 3.56 | 50.09  |
| <b>BAP37</b> | > 100                              | 272.27 | 4                   | 1            | 3               | 3.65 | 46.53  |
| <b>BAP38</b> | > 100                              | 292.25 | 5                   | 0            | 2               | 4.71 | 26.30  |
| <b>BAP39</b> | > 100                              | 252.31 | 4                   | 1            | 2               | 4.40 | 37.29  |
| <b>BAP40</b> | > 100                              | 345.41 | 7                   | 1            | 4               | 2.95 | 80.85  |

|              |       |        |   |   |   |      |       |
|--------------|-------|--------|---|---|---|------|-------|
| <b>BAP41</b> | > 100 | 342.39 | 7 | 0 | 5 | 4.12 | 53.99 |
| <b>BAP42</b> | > 100 | 383.44 | 7 | 0 | 6 | 3.50 | 57.23 |
| <b>BAP43</b> | > 100 | 340.37 | 6 | 0 | 5 | 3.71 | 53.99 |

---

<sup>a</sup> IC<sub>50</sub> is defined as the drug concentration causing a 50% decrease in PDI activity.

<sup>b</sup> Values (mean ± SD) are calculated from three independent experiments.

**Table S2.** Cytotoxicity of active compounds in GBM cell lines

| Chalcone    | IC <sub>50</sub> <sup>a</sup> (μM) |              |              |
|-------------|------------------------------------|--------------|--------------|
|             | NU04                               | U87MG        | U118MG       |
| <b>BAP1</b> | 8.13 ± 0.55 <sup>b</sup>           | 9.63 ± 0.27  | 17.69 ± 1.93 |
| <b>BAP2</b> | 5.33 ± 1.75                        | 5.97 ± 1.50  | 4.29 ± 1.42  |
| <b>BAP3</b> | 7.46 ± 2.03                        | 7.53 ± 1.00  | 10.13 ± 1.75 |
| <b>BAP4</b> | 14.21 ± 0.43                       | 15.41 ± 0.32 | 16.99 ± 2.67 |
| <b>BAP5</b> | > 20                               | > 20         | > 20         |
| <b>BAP6</b> | 15.82 ± 0.83                       | 15.06 ± 0.09 | 15.08 ± 0.76 |
| TMZ         | 549 ± 225                          | 596 ± 178    | 944 ± 127    |

<sup>a</sup>IC<sub>50</sub> is defined as the drug concentration causing a 50% decrease in the cell population.

<sup>b</sup>Values (mean ± SD) are calculated from three independent experiments.



**Table S3.** The top 20 genes upregulated after **BAP2** treatment

| <b>Gene Symbol</b> | <b>Description</b>                                                              | <b>Fold Change</b> |
|--------------------|---------------------------------------------------------------------------------|--------------------|
| ANKRD1             | ankyrin repeat domain 1                                                         | 1164.883           |
| HSPA6              | heat shock 70kDa protein 7 (HSP70B); heat shock 70kDa protein 6 (HSP70B')       | 875.728            |
| HSPA4L             | heat shock 70kDa protein 4-like                                                 | 175.279            |
| HSPH1              | heat shock 105kDa/110kDa protein 1                                              | 99.493             |
| MAP2               | microtubule-associated protein 2                                                | 94.301             |
| TRIB3              | tribbles homolog 3 (Drosophila)                                                 | 81.200             |
| ARAP2              | ArfGAP with RhoGAP domain, ankyrin repeat and PH domain 2                       | 53.228             |
| KLHL24             | kelch-like 24 (Drosophila)                                                      | 45.567             |
| CTH                | cystathionase (cystathionine gamma-lyase)                                       | 41.895             |
| SORBS1             | sorbin and SH3 domain containing 1                                              | 41.456             |
| RNF103             | vacuolar protein sorting 24 homolog (S. cerevisiae); ring finger protein 103    | 41.324             |
| FBXO32             | F-box protein 32                                                                | 40.778             |
| SLC7A11            | solute carrier family 7, (cationic amino acid transporter, y+ system) member 11 | 40.163             |
| RUNDC3B            | RUN domain containing 3B                                                        | 36.265             |
| OTUD1              | OTU domain containing 1                                                         | 34.522             |
| JHDM1D             | jumonji C domain containing histone demethylase 1 homolog D (S. cerevisiae)     | 34.293             |
| ALOXE3             | arachidonate lipoxygenase 3                                                     | 31.022             |
| GPR137C            | G protein-coupled receptor 137C                                                 | 29.713             |
| DNAJB4             | DnaJ (Hsp40) homolog, subfamily B, member 4                                     | 28.393             |
| ZFAND2A            | zinc finger, AN1-type domain 2A                                                 | 27.559             |

**Table S4.** The top 20 genes downregulated after **BAP2** treatment

| <b>Gene Symbol</b> | <b>Description</b>                                                         | <b>Fold Change</b> |
|--------------------|----------------------------------------------------------------------------|--------------------|
| METTL12            | methyltransferase like 12                                                  | 0.008              |
| ARHGAP22           | Rho GTPase activating protein 22                                           | 0.027              |
| CENPM              | centromere protein M                                                       | 0.031              |
| KY                 | kyphoscoliosis peptidase                                                   | 0.033              |
| SLC10A5            | solute carrier family 10 (sodium/bile acid cotransporter family), member 5 | 0.033              |
| TUBB               | Beta Tubulin                                                               | 0.035              |
| STX1A              | syntaxin 1A (brain)                                                        | 0.037              |
| SIVA1              | SIVA1, apoptosis-inducing factor                                           | 0.038              |
| HLA-DRA            | major histocompatibility complex, class II, DR alpha                       | 0.041              |
|                    | ribosomal protein S18 pseudogene 12; ribosomal protein S18 pseudogene 5;   |                    |
| RPS18              | ribosomal protein S18                                                      | 0.043              |
| DUS3L              | dihydrouridine synthase 3-like ( <i>S. cerevisiae</i> )                    | 0.050              |
| SNHG3              | small nucleolar RNA host gene 3 (non-protein coding)                       | 0.051              |
| ATOH8              | atonal homolog 8 ( <i>Drosophila</i> )                                     | 0.054              |
| ABT1               | activator of basal transcription 1                                         | 0.055              |
| CDCA7              | cell division cycle associated 7                                           | 0.056              |
| LMNB1              | lamin B1                                                                   | 0.059              |
| SNHG11             | small nucleolar RNA host gene 11 (non-protein coding)                      | 0.059              |
| PPAN               | peter pan homolog ( <i>Drosophila</i> )                                    | 0.062              |
| C6orf48            | chromosome 6 open reading frame 48; small nucleolar RNA, C/D box 52        | 0.066              |
| C19orf48           | chromosome 19 open reading frame 48                                        | 0.067              |
| SCARNA2            | small Cajal body-specific RNA 2                                            | 0.068              |

**Table S5.** The top 10 Ingenuity canonical pathways involving genes influenced by **BAP2** treatment

| <b>Canonical pathway</b>                       | <b>P-value</b> | <b>Ratio</b>  |
|------------------------------------------------|----------------|---------------|
| Protein ubiquitination pathway                 | 1.12E-10       | 63 out of 263 |
| NRF2-mediated oxidative stress response        | 2.40E-09       | 47 out of 187 |
| Aldosterone signaling in epithelial cells      | 3.63E-07       | 38 out of 156 |
| ERK5 signaling                                 | 2.00E-05       | 19 out of 64  |
| tRNA charging                                  | 2.00E-05       | 14 out of 38  |
| Hereditary breast cancer signaling             | 3.89E-05       | 27 out of 119 |
| Hypoxia signaling in the cardiovascular system | 7.24E-05       | 18 out of 64  |
| Role of BRCA1 in DNA damage response           | 1.26E-04       | 17 out of 63  |
| p53 signaling                                  | 2.19E-04       | 23 out of 100 |
| Prostate cancer signaling                      | 2.24E-04       | 20 out of 91  |

**Table S6.** The top 20 gene sets for genes upregulated by **BAP2** treatment

| Gene set <sup>a</sup>                                      | Size | ES <sup>b</sup> | NES <sup>c</sup> |
|------------------------------------------------------------|------|-----------------|------------------|
| PODAR_RESPONSE_TO_ADAPHOSTIN_UP                            | 111  | 0.663           | 2.871            |
| GSE9988_ANTI_TREM1_AND_LPS_VS_CTRL_TREATED_MONOCYTES_UP    | 130  | 0.621           | 2.751            |
| GARGALOVIC_RESPONSE_TO_OXIDIZED_PHOSPHOLIPIDS_BLUE_UP      | 106  | 0.620           | 2.660            |
| GSE9988_ANTI_TREM1_VS_CTRL_TREATED_MONOCYTES_UP            | 135  | 0.588           | 2.646            |
| GERY_CEBP_TARGETS                                          | 57   | 0.678           | 2.633            |
| GSE9988_ANTI_TREM1_VS_VEHICLE_TREATED_MONOCYTES_UP         | 129  | 0.592           | 2.630            |
| GSE9988_ANTI_TREM1_AND_LPS_VS_VEHICLE_TREATED_MONOCYTES_UP | 117  | 0.594           | 2.624            |
| AMUNDSON_RESPONSE_TO_ARSENITE                              | 147  | 0.572           | 2.575            |
| CONCANNON_APOPTOSIS_BY_EPOXOMICIN_UP                       | 149  | 0.556           | 2.539            |
| HELLER_SILENCED_BY_METHYLATION_DN                          | 59   | 0.636           | 2.481            |
| PICCALUGA_ANGIOIMMUNOBLASTIC_LYMPHOMA_DN                   | 100  | 0.580           | 2.465            |
| GSE9988_LOW_LPS_VS_ANTI_TREM1_AND_LPS_MONOCYTE_DN          | 122  | 0.542           | 2.425            |
| BLUM_RESPONSE_TO_SALIRASIB_UP                              | 193  | 0.512           | 2.400            |
| GSE9988_LPS_VS_LPS_AND_ANTI_TREM1_MONOCYTE_DN              | 129  | 0.537           | 2.398            |
| KRIGE_AMINO_ACID_DEPRIVATION                               | 22   | 0.754           | 2.361            |
| GARGALOVIC_RESPONSE_TO_OXIDIZED_PHOSPHOLIPIDS_MAGENTA_UP   | 23   | 0.728           | 2.322            |
| GSE29617_CTRL_VS_DAY7_TIV_FLU_VACCINE_PBMC_2008_UP         | 105  | 0.536           | 2.321            |
| GSE22886_NAIVE_TCELL_VS_DC_DN                              | 114  | 0.529           | 2.303            |
| GROSS_HYPOXIA_VIA_ELK3_DN                                  | 103  | 0.535           | 2.299            |
| MODULE_355                                                 | 21   | 0.750           | 2.293            |

<sup>a</sup>The criteria for the GSEA analysis was  $P < 0.05$  and  $FDR < 25\%$ .

<sup>b</sup>ES: enrichment score.

<sup>c</sup>NES: normalized enrichment score.

**Table S7.** The top 20 gene sets for genes downregulated by **BAP2** treatment

| Gene set <sup>a</sup>                                      | Size | ES <sup>b</sup> | NES <sup>c</sup> |
|------------------------------------------------------------|------|-----------------|------------------|
| DUTERTRE_ESTRADIOL_RESPONSE_24HR_UP                        | 217  | -0.608          | -3.020           |
| MANALO_HYPOXIA_DN                                          | 231  | -0.600          | -2.994           |
| GOBERT_OLIGODENDROCYTE_DIFFERENTIATION_UP                  | 394  | -0.552          | -2.936           |
| ZHANG_TLX_TARGETS_60HR_DN                                  | 227  | -0.579          | -2.905           |
| KOBAYASHI_EGFR_SIGNALING_24HR_DN                           | 221  | -0.575          | -2.887           |
| ROSTY_CERVICAL_CANCER_PROLIFERATION_CLUSTER                | 120  | -0.628          | -2.822           |
| GNF2_PCNA                                                  | 65   | -0.697          | -2.820           |
| GSE15750_DAY6_VS_DAY10_TRAF6KO_EFF_CD8_TCELL_UP            | 153  | -0.592          | -2.802           |
| LEE_EARLY_T_LYMPHOCYTE_UP                                  | 75   | -0.668          | -2.799           |
| GNF2_CCNA2                                                 | 65   | -0.672          | -2.761           |
| KONG_E2F3_TARGETS                                          | 77   | -0.654          | -2.753           |
| GRAHAM_CML_DIVIDING_VS_NORMAL QUIESCENT_UP                 | 127  | -0.595          | -2.746           |
| GARGALOVIC_RESPONSE_TO_OXIDIZED_PHOSPHOLIPIDS_TURQUOISE_DN | 30   | -0.790          | -2.736           |
| GSE24634_TEFF_VS_TCONV_DAY7_IN_CULTURE_UP                  | 132  | -0.588          | -2.723           |
| REN_BOUND_BY_E2F                                           | 55   | -0.689          | -2.706           |
| GRAHAM_NORMAL QUIESCENT_VS_NORMAL_DIVIDING_DN              | 69   | -0.650          | -2.693           |
| GNF2_SMC4L1                                                | 82   | -0.629          | -2.688           |
| GNF2_MCM4                                                  | 50   | -0.690          | -2.679           |
| ZHOU_CELL_CYCLE_GENES_IN_IR_RESPONSE_6HR                   | 73   | -0.646          | -2.679           |
| CHANG_CYCLING_GENES                                        | 122  | -0.592          | -2.678           |

<sup>a</sup>The criteria for the GSEA analysis was  $P < 0.05$  and  $FDR < 25\%$ .

<sup>b</sup>ES: enrichment score.

<sup>c</sup>NES: normalized enrichment score.

**Table S8.** Fold change values of DNA repair genes for **BAP2**, **PACMA31** and siPDI 48 hr treatments.

| DNA Repair Genes (Wood Laboratory)            | Activity                                                                                           | FC (BAP2) | FC (PACMA31) | FC (siPDI_48hr) |
|-----------------------------------------------|----------------------------------------------------------------------------------------------------|-----------|--------------|-----------------|
| <b>Base excision repair (BER)</b>             | DNA glycosylases: major altered base released                                                      |           |              |                 |
| UNG                                           | <a href="#">U</a>                                                                                  | 0.342     | 0.405        | 0.382           |
| SMUG1                                         | <a href="#">U</a>                                                                                  | 0.342     | 1.133        | 1.555           |
| MBD4                                          | <a href="#">U or T opposite G at CpG sequences</a>                                                 | 1.54      | 0.969        | 1.07            |
| TDG                                           | <a href="#">U, T or ethenoC opposite G</a>                                                         | 1.078     | 1.067        | 0.816           |
| OGG1                                          | <a href="#">8-oxoG opposite C</a>                                                                  | NA        | 1.367        | 1.013           |
| MUTYH                                         | <a href="#">A opposite 8-oxoG</a>                                                                  | NA        | NA           | NA              |
| NTHL1                                         | <a href="#">Ring-saturated or fragmented pyrimidines</a>                                           | NA        | NA           | NA              |
| MPG                                           | <a href="#">3-meA, ethenoA, hypoxanthine</a>                                                       | NA        | NA           | NA              |
| NEIL1                                         | <a href="#">Removes thymine glycol</a>                                                             | NA        | NA           | NA              |
| NEIL2                                         | <a href="#">Removes oxidative products of pyrimidines</a>                                          | 1.216     | 0.791        | 2.184           |
| NEIL3                                         | <a href="#">Removes oxidative products of pyrimidines</a>                                          | 0.098     | NA           | 0.979           |
| APEX1                                         | <a href="#">AP endonuclease</a>                                                                    | NA        | NA           | NA              |
| APEX2                                         | <a href="#">AP endonuclease</a>                                                                    | 0.278     | 0.73         | 0.639           |
| LIG3                                          | <a href="#">DNA Ligase III</a>                                                                     | 0.593     | 0.752        | 0.735           |
| XRCC1                                         | <a href="#">LIG3 accessory factor</a>                                                              | 0.098     | 0.695        | 0.68            |
| PNKP                                          | <a href="#">Converts some DNA breaks to ligatable ends</a>                                         | NA        | 0.855        | 0.482           |
| APEX1                                         | <a href="#">Accessory factor for DNA end-joining</a>                                               | 0.898     | 0.825        | 0.849           |
| PARP1                                         | <a href="#">Protects strand interruptions</a>                                                      | NA        | NA           | NA              |
| PARP2                                         | <a href="#">PARP-like enzyme</a>                                                                   | NA        | NA           | NA              |
| PARP3                                         | <a href="#">PARP-like enzyme</a>                                                                   | NA        | NA           | NA              |
| <b>Direct reversal of damage</b>              |                                                                                                    |           |              |                 |
| MGMT                                          | <a href="#">O6-meG alkyltransferase</a>                                                            | NA        | NA           | NA              |
| ALKBH2                                        | <a href="#">1-meA dioxygenase</a>                                                                  | NA        | NA           | NA              |
| ALKBH3                                        | <a href="#">1-meA dioxygenase</a>                                                                  | NA        | NA           | NA              |
| <b>Repair of DNA-topoisomerase crosslinks</b> |                                                                                                    |           |              |                 |
| TDP1                                          | <a href="#">Removes 3'-tyrosylphosphate and 3'-phosphoglycolate from DNA; human disorder SCAN1</a> | 0.493     | 0.341        | 0.994           |
| TDP2                                          | <a href="#">5'- and 3'-tyrosyl DNA phosphodiesterase</a>                                           | 0.694     | 1.57         | 1.456           |
| <b>Mismatch excision repair (MMR)</b>         |                                                                                                    |           |              |                 |
| MSH2                                          | Mismatch (MSH2-MSH6) and loop (MSH2-MSH3) recognition                                              | 0.29      | 0.456        | 0.645           |
| MSH3                                          |                                                                                                    | 0.283     | 0.94         | 0.801           |

|                                         |                                                                                   |       |       |       |
|-----------------------------------------|-----------------------------------------------------------------------------------|-------|-------|-------|
| MSH6                                    | MSH2, MSH3, MSH6                                                                  | 0.565 | 0.465 | 0.618 |
| MLH1                                    | MutL homologs, forming heterodimer                                                | 1.045 | 0.681 | 0.87  |
| PMS2                                    | MLH1, PMS2                                                                        | NA    | NA    | NA    |
| MSH4                                    | MutS homologs specialized for meiosis                                             | NA    | NA    | NA    |
| MSH5                                    | MSH4, MSH5                                                                        | NA    | NA    | 0.643 |
| MLH3                                    | MutL homologs of unknown function                                                 | 0.342 | 1.089 | 1.328 |
| PMS1                                    |                                                                                   | 0.168 | 0.806 | 0.821 |
| PMS2L3                                  | MLH3, PMS1, PMS2L3                                                                | NA    | NA    | NA    |
| <b>Nucleotide excision repair (NER)</b> | (XP = xeroderma pigmentosum)                                                      |       |       |       |
| XPC                                     | Binds DNA distortions                                                             | 0.65  | 1.013 | 1.024 |
| RAD23B                                  |                                                                                   | 1.079 | 0.8   | 1.206 |
| CETN2                                   | XPC, RAD23B, CETN2                                                                | 2.773 | 1.191 | 1.048 |
| RAD23A                                  | <a href="#">Substitutes for RAD23B</a>                                            | 0.512 | 1.261 | 0.9   |
| XPA                                     | <a href="#">Binds damaged DNA in preincision complex</a>                          | 0.424 | 1.055 | 1.161 |
| DDB1                                    | Complex defective in XP group E                                                   | 1.26  | 0.837 | 1.097 |
| DDB2                                    | DDB1, DDB2                                                                        | NA    | NA    | NA    |
| RPA1                                    | Binds DNA in preincision complex                                                  | 0.586 | 0.598 | 0.837 |
| RPA2                                    |                                                                                   | 0.37  | 0.51  | 0.756 |
| RPA3                                    | RPA1, RPA2, RPA3                                                                  | NA    | NA    | NA    |
| TFIIH                                   | <i>Catalyzes unwinding in preincision complex</i>                                 | NA    | NA    | NA    |
| ERCC3                                   | <a href="#">3' to 5' DNA helicase</a>                                             | NA    | NA    | NA    |
| ERCC2                                   | <a href="#">5' to 3' DNA helicase</a>                                             | NA    | NA    | NA    |
| GTF2H1                                  | <a href="#">Core TFIIH subunit p62</a>                                            | 1.714 | 1.097 | 0.976 |
| GTF2H2                                  | <a href="#">Core TFIIH subunit p44</a>                                            | NA    | NA    | NA    |
| GTF2H3                                  | <a href="#">Core TFIIH subunit p34</a>                                            | 2.067 | 0.849 | 0.896 |
| GTF2H4                                  | <a href="#">Core TFIIH subunit p52</a>                                            | NA    | NA    | NA    |
| GTF2H5                                  | <a href="#">Core TFIIH subunit p8</a>                                             | NA    | NA    | NA    |
| CDK7                                    | Kinase subunits of TFIIH                                                          | 2.187 | 0.871 | 1.163 |
| CCNH                                    |                                                                                   | 1.438 | 0.734 | 0.915 |
| MNAT1                                   | CDK7, CCNH, MNAT1                                                                 | 2.14  | 0.904 | 0.976 |
| ERCC5                                   | <a href="#">3' incision</a>                                                       | NA    | NA    | NA    |
| ERCC1                                   | <a href="#">5' incision DNA binding subunit</a>                                   | 0.959 | 0.909 | 0.681 |
| ERCC4                                   | <a href="#">5' incision catalytic subunit</a>                                     | NA    | NA    | NA    |
| LIG1                                    | <a href="#">DNA ligase</a>                                                        | NA    | NA    | NA    |
| <b>NER-related</b>                      |                                                                                   | NA    | NA    | NA    |
| ERCC8                                   | Cockayne syndrome and UV-Sensitive Syndrome; Needed for transcription-coupled NER | NA    | NA    | NA    |
| ERCC6                                   |                                                                                   | NA    | NA    | NA    |
| UVSSA                                   | ERCC8, ERCC6, UV-sensitive                                                        | NA    | NA    | NA    |

|                                 |                                                                                                                  |       |       |       |
|---------------------------------|------------------------------------------------------------------------------------------------------------------|-------|-------|-------|
|                                 | syndrome                                                                                                         |       |       |       |
| XAB2                            | <a href="#">XAB2</a>                                                                                             | NA    | NA    | NA    |
| MMS19                           | Iron-sulfur cluster loading and transport                                                                        | 0.409 | 0.768 | 1.29  |
| <b>Homologous recombination</b> |                                                                                                                  |       |       |       |
| RAD51                           | <a href="#">Homologous pairing</a>                                                                               | 0.087 | NA    | 0.437 |
| RAD51B                          | <a href="#">Rad51 homolog</a>                                                                                    | NA    | NA    | 1.037 |
| RAD51D                          | <a href="#">Rad51 homolog</a>                                                                                    | 0.161 | 0.729 | 0.585 |
| DMC1                            | <a href="#">Rad51 homolog, meiosis</a>                                                                           | NA    | NA    | NA    |
| XRCC2                           | DNA break and crosslink repair                                                                                   | 0.241 | NA    | 0.446 |
| XRCC3                           | XRCC2, XRCC3                                                                                                     | NA    | NA    | NA    |
| RAD52                           | Accessory factors for recombination                                                                              | NA    | 0.939 | NA    |
| RAD54L                          |                                                                                                                  | 0.15  | NA    | 0.56  |
| RAD54B                          | RAD52, RAD54L, RAD54B                                                                                            | 0.836 | 0.385 | 0.969 |
| BRCA1                           | <a href="#">Accessory factor for transcription and recombination, E3 Ubiquitin ligase</a>                        | 0.763 | NA    | 0.507 |
| SHFM1                           | <a href="#">BRCA2 associated</a>                                                                                 | NA    | NA    | NA    |
| RAD50                           | <a href="#">ATPase in complex with MRE11A, NBS1</a>                                                              | 0.613 | 0.993 | 1.119 |
| MRE11A                          | <a href="#">3' exonuclease, defective in ATLD (ataxia-telangiectasia-like disorder)</a>                          | NA    | 0.485 | 0.577 |
| NBN                             | <a href="#">Mutated in Nijmegen breakage syndrome</a>                                                            | NA    | NA    | NA    |
| RBBP8                           | <a href="#">Promotes DNA end resection</a>                                                                       | NA    | NA    | NA    |
| MUS81                           | Subunits of structure-specific DNA nuclease                                                                      | NA    | 0.843 | 0.657 |
| EME1                            |                                                                                                                  | NA    | NA    | NA    |
| EME2                            | MUS81, EME1, EME2                                                                                                | NA    | NA    | NA    |
| GIYD1                           | <a href="#">subunit of SLX1-SLX4 structure-specific nuclease, two identical tandem genes in the human genome</a> | NA    | NA    | NA    |
| GIYD2                           |                                                                                                                  | NA    | NA    | NA    |
| GEN1                            | <a href="#">Nuclease cleaving Holliday junctions</a>                                                             | 0.808 | 0.536 | 1.01  |
| <b>Fanconi anemia</b>           |                                                                                                                  |       |       |       |
| FANCA                           | <a href="#">FANCA</a>                                                                                            | 0.201 | 0.32  | 0.365 |
| FANCB                           | <a href="#">FANCB</a>                                                                                            | 0.779 | NA    | 0.564 |
| FANCC                           | <a href="#">FANCC</a>                                                                                            | 0.439 | 0.295 | 0.754 |
| BRCA2                           | <a href="#">Cooperation with RAD51, essential function</a>                                                       | NA    | NA    | NA    |
| FANCD2                          | <a href="#">target for monoubiquitination</a>                                                                    | 0.479 | NA    | 0.727 |
| FANCE                           | <a href="#">FANCE</a>                                                                                            | NA    | NA    | NA    |
| FANCF                           | <a href="#">FANCF</a>                                                                                            | 0.255 | 1.142 | 0.987 |
| FANCG                           | <a href="#">FANCG</a>                                                                                            | NA    | NA    | NA    |
| FANCI                           | <a href="#">target for monoubiquitination</a>                                                                    | NA    | NA    | NA    |
| BRIP1                           | <a href="#">DNA helicase, BRCA1-interacting</a>                                                                  | NA    | NA    | NA    |
| FANCL                           | <a href="#">FANCL</a>                                                                                            | 0.248 | 0.52  | 0.586 |



|                                         |                                                                                |       |       |       |
|-----------------------------------------|--------------------------------------------------------------------------------|-------|-------|-------|
| FANCM                                   | <a href="#">helicase/translocase</a>                                           | 0.367 | 0.35  | 0.903 |
| PALB2                                   | <a href="#">co-localizes with BRCA2 (FANCD1)</a>                               | 0.267 | 0.775 | 0.607 |
| RAD51C                                  | Rad51 homolog FANCO                                                            | NA    | NA    | 0.769 |
| BTBD12 (SLX4)                           | nuclease subunit/scaffold BTBD12 (SLX4) FANCP                                  |       |       |       |
| FAAP20                                  | FANCA - associated                                                             | NA    | NA    | NA    |
| FAAP24                                  | <a href="#">FAAP24</a>                                                         | NA    | NA    | NA    |
| <b>Non-homologous end-joining</b>       |                                                                                |       |       |       |
| XRCC6                                   | <a href="#">DNA end binding subunit</a>                                        | NA    | NA    | NA    |
| XRCC5                                   | <a href="#">DNA end binding subunit</a>                                        | NA    | NA    | NA    |
| PRKDC                                   | <a href="#">DNA-dependent protein kinase catalytic subunit</a>                 | 0.253 | 0.56  | 0.481 |
| LIG4                                    | <a href="#">Ligase</a>                                                         | 2.181 | 0.876 | 1.276 |
| XRCC4                                   | <a href="#">Ligase accessory factor</a>                                        | 2.148 | 0.549 | 0.875 |
| DCLRE1C                                 | <a href="#">Nuclease</a>                                                       | NA    | NA    | NA    |
| NHEJ1                                   | <a href="#">End-joining factor</a>                                             | NA    | NA    | NA    |
| <b>Modulation of nucleotide pools</b>   |                                                                                |       |       |       |
| NUDT1                                   | <a href="#">8-oxoGTPase</a>                                                    | NA    | NA    | NA    |
| DUT                                     | <a href="#">dUTPase</a>                                                        | 0.226 | 0.344 | 0.54  |
| RRM2B                                   | <a href="#">p53-inducible ribonucleotide reductase small subunit 2 homolog</a> | 1.275 | 0.954 | 1.737 |
| <b>DNA polymerases</b>                  |                                                                                |       |       |       |
| POLB                                    | <a href="#">BER in nuclear DNA</a>                                             | NA    | NA    | NA    |
| POLG                                    | <a href="#">BER in mitochondrial DNA</a>                                       | 0.368 | 1.261 | 0.857 |
| POLD1                                   | NER and MMR                                                                    | NA    | NA    | NA    |
| POLE                                    | POLD1, POLE1                                                                   | 0.418 | 0.318 | 0.446 |
| PCNA                                    | <a href="#">Sliding clamp for pol delta and pol epsilon</a>                    | 0.204 | 0.305 | 0.597 |
| REV3L                                   | <a href="#">DNA pol zeta catalytic subunit, essential function</a>             | 1.188 | 0.721 | 1.272 |
| MAD2L2                                  | <a href="#">DNA pol zeta subunit</a>                                           | NA    | NA    | NA    |
| REV1L                                   | <a href="#">dCMP transferase</a>                                               | NA    | NA    | NA    |
| POLH                                    | <a href="#">xeroderma pigmentosum (XP) variant</a>                             | 0.679 | 0.772 | 1.115 |
| POLI                                    | <a href="#">Lesion bypass</a>                                                  | NA    | 1.174 | 2.25  |
| POLQ                                    | <a href="#">Sensitivity to ionizing radiation</a>                              | 0.54  | NA    | 0.583 |
| POLK                                    | <a href="#">Lesion bypass and NER</a>                                          | 1.745 | 0.839 | 1.174 |
| POLL                                    | <a href="#">Gap-filling during non-homologous end-joining</a>                  | NA    | 1.308 | 1.534 |
| POLM                                    | <a href="#">Gap filling during non-homologous end-joining</a>                  | NA    | 1.286 | NA    |
| POLN                                    | <a href="#">DNA crosslink repair?</a>                                          | NA    | NA    | NA    |
| <b>Editing and processing nucleases</b> |                                                                                |       |       |       |
| FEN1                                    | <a href="#">5' nuclease</a>                                                    | NA    | NA    | NA    |

|                                                                                       |                                                                                     |       |       |       |
|---------------------------------------------------------------------------------------|-------------------------------------------------------------------------------------|-------|-------|-------|
| FAN1                                                                                  | <a href="#">5' nuclease interacting with FANCD2</a>                                 | 0.346 | 1.086 | 0.741 |
| TREX1                                                                                 | <a href="#">3' exonuclease</a>                                                      | NA    | NA    | NA    |
| TREX2                                                                                 | <a href="#">3' exonuclease</a>                                                      | NA    | NA    | NA    |
| EXO1                                                                                  | <a href="#">5' exonuclease</a>                                                      | 0.226 | NA    | 0.5   |
| APTX                                                                                  | <a href="#">Processing of DNA single-strand interruptions</a>                       | NA    | NA    | NA    |
| SPO11                                                                                 | <a href="#">endonuclease</a>                                                        | NA    | NA    | NA    |
| ENDOV                                                                                 | incision 3' of hypoxanthine and uracil in DNA and inosine in RNA                    | NA    | NA    | NA    |
| <b>Ubiquitination and modification</b>                                                |                                                                                     |       |       |       |
| UBE2A                                                                                 | <a href="#">Ubiquitin-conjugating enzyme</a>                                        | 1.963 | 1     | 0.897 |
| UBE2B                                                                                 | <a href="#">Ubiquitin-conjugating enzyme</a>                                        | NA    | NA    | NA    |
| RAD18                                                                                 | <a href="#">E3 ubiquitin ligase</a>                                                 | 2.488 | 0.336 | 0.584 |
| SHPRH                                                                                 | E3 ubiquitin ligase, SWI/SNF related, homolog of <i>S. cerevisiae</i> Rad5          | 0.37  | 1.225 | 1.077 |
| HLTF                                                                                  | <a href="#">E3 ubiquitin ligase, SWI/SNF related, homolog of S. cerevisiae Rad5</a> | NA    | NA    | NA    |
| RNF168                                                                                | <a href="#">E3 ubiquitin ligase for DSB repair; ATM-like and RIDDLE syndrome</a>    | 0.595 | 0.695 | 0.665 |
| SPRTN                                                                                 | <a href="#">Reads ubiquitylation</a>                                                | NA    | NA    | NA    |
| RNF8                                                                                  | <a href="#">E3 ubiquitin ligase for DSB repair</a>                                  | NA    | NA    | NA    |
| RNF4                                                                                  | <a href="#">E3 ubiquitin ligase</a>                                                 | 0.566 | 0.682 | 0.963 |
| UBE2V2                                                                                | Ubiquitin-conjugating complex                                                       | 0.68  | 0.993 | 1.239 |
| UBE2N                                                                                 | UBE2V2, UBE2N                                                                       | 0.709 | 0.828 | 1     |
| <b>Chromatin Structure and Modification</b>                                           |                                                                                     |       |       |       |
| H2AFX                                                                                 | <a href="#">Histone, phosphorylated after DNA damage</a>                            | NA    | NA    | NA    |
| CHAF1A                                                                                | <a href="#">Chromatin assembly factor</a>                                           | 0.213 | NA    | 0.513 |
| SETMAR                                                                                | <a href="#">DNA damage-associated histone methylase and nuclease</a>                | NA    | NA    | NA    |
| <b>Genes defective in diseases associated with sensitivity to DNA damaging agents</b> |                                                                                     |       |       |       |
| BLM                                                                                   | <a href="#">Bloom syndrome helicase</a>                                             | 0.228 | NA    | 0.463 |
| WRN                                                                                   | <a href="#">Werner syndrome helicase / 3' - exonuclease</a>                         | 0.648 | 0.73  | 0.562 |
| RECQL4                                                                                | <a href="#">Rothmund-Thompson syndrome</a>                                          | NA    | NA    | NA    |
| ATM                                                                                   | <a href="#">ataxia telangiectasia</a>                                               | NA    | 0.787 | 0.869 |
| TTDN1                                                                                 | <a href="#">non-photosensitive form of trichothiodystrophy</a>                      | NA    | NA    | NA    |
| <b>Other identified genes with known or suspected DNA repair</b>                      |                                                                                     |       |       |       |

|                                                  |                                                                  |       |       |       |
|--------------------------------------------------|------------------------------------------------------------------|-------|-------|-------|
| <b>function</b>                                  |                                                                  |       |       |       |
| DCLRE1A                                          | <a href="#">DNA crosslink repair</a>                             | NA    | NA    | NA    |
| DCLRE1B                                          | <a href="#">Related to SNM1</a>                                  | NA    | NA    | NA    |
| RPA4                                             | <a href="#">Similar to RPA2</a>                                  | NA    | 1.699 | NA    |
| PRPF19                                           | <a href="#">DNA crosslink repair; binding to SETMAR</a>          | NA    | NA    | NA    |
| RECQL                                            | <a href="#">DNA helicase</a>                                     | NA    | NA    | NA    |
| RECQL5                                           | <a href="#">DNA helicase</a>                                     | NA    | 1.197 | NA    |
| HELQ                                             | <a href="#">DNA helicase</a>                                     | NA    | NA    | NA    |
| RDM1                                             | <a href="#">Similar to RAD52</a>                                 | NA    | NA    | NA    |
| OBFC2B                                           | <a href="#">Single-stranded DNA binding protein</a>              | 1.949 | 0.897 | 0.885 |
| <b>Other conserved DNA damage response genes</b> |                                                                  |       |       |       |
| ATR                                              | <a href="#">ATM- and PI-3K-like essential kinase</a>             | 0.211 | 0.96  | 0.632 |
| ATRIP                                            | <a href="#">ATR-interacting protein</a>                          | 0.14  | 0.436 | 0.585 |
| MDC1                                             | <a href="#">Mediator of DNA damage checkpoint</a>                | NA    | NA    | NA    |
| RAD1                                             | subunits of PCNA-like sensor of damaged DNA                      | 0.653 | 0.502 | 0.726 |
| RAD9A                                            |                                                                  | NA    | NA    | NA    |
| HUS1                                             | RAD1, RAD9, HUS1                                                 | 0.8   | 1.186 | 1.131 |
| RAD17                                            | <a href="#">RFC-like DNA damage sensor</a>                       | NA    | NA    | NA    |
| CHEK1                                            | Effector kinases                                                 | 0.513 | 0.394 | 0.657 |
| CHEK2                                            | CHEK1, CHEK2                                                     | NA    | NA    | NA    |
| TP53                                             | <a href="#">Regulation of the cell cycle</a>                     | NA    | NA    | NA    |
| TP53BP1                                          | <a href="#">chromatin-binding checkpoint protein</a>             | NA    | NA    | NA    |
| RIF1                                             | <a href="#">suppressor of 5'-end-resection</a>                   | 0.652 | 0.545 | 0.738 |
| TOPBP1                                           | <a href="#">DNA damage checkpoint control</a>                    | 0.491 | 0.406 | 0.636 |
| CLK2                                             | <a href="#">S-phase check point and biological clock protein</a> | 0.419 | 1.083 | 1.18  |
| PER1                                             | <a href="#">S-phase check point and biological clock protein</a> | NA    | NA    | NA    |

**Table S9.** Fold change values of E2F genes for **BAP2**, **PACMA31** and siPDI 48 hr treatments

| Gene    | FC (BAP2) | FC (PACMA31) | FC (siPDI_48hr) |
|---------|-----------|--------------|-----------------|
| AK2     | 0.951     | 0.863        | 1.533           |
| ANP32E  | 1.203     | 0.291        | 1.177           |
| ASF1A   | 0.744     | 0.63         | 1.236           |
| ASF1B   | 0.487     | NA           | 0.575           |
| ATAD2   | 0.689     | NA           | 0.548           |
| AURKA   | 0.238     | 0.419        | 1.238           |
| AURKB   | 0.072     | NA           | 0.545           |
| BARD1   | 0.105     | NA           | 0.765           |
| BIRC5   | 0.33      | NA           | 0.718           |
| BRCA1   | 0.763     | NA           | 0.507           |
| BRCA2   | 0.785     | NA           | 0.615           |
| BRMS1L  | 0.9       | 0.803        | 0.897           |
| BUB1B   | 0.222     | NA           | 0.775           |
| CBX5    | 0.505     | 0.478        | 0.82            |
| CCNB2   | 0.548     | 0.362        | 1.388           |
| CCNE1   | 2.098     | NA           | NA              |
| CCP110  | 0.322     | 0.366        | 1.067           |
| CDC20   | 0.314     | 0.304        | 0.78            |
| CDC25A  | 0.208     | NA           | 0.343           |
| CDC25B  | 0.458     | 0.674        | 0.912           |
| CDCA3   | 0.338     | NA           | 0.932           |
| CDCA8   | 0.195     | NA           | 0.935           |
| CDK1    | 0.188     | NA           | 0.974           |
| CDK4    | 1.097     | 0.719        | 0.675           |
| CDKN1A  | 1.194     | 0.812        | 0.898           |
| CDKN1B  | 0.901     | 0.635        | 2.107           |
| CDKN2A  | NA        | NA           | NA              |
| CDKN2C  | NA        | NA           | NA              |
| CDKN3   | 0.572     | 0.295        | 1.357           |
| CENPE   | 0.453     | NA           | 1               |
| CENPM   | 0.031     | NA           | 0.309           |
| CHEK1   | 0.513     | 0.394        | 0.657           |
| CHEK2   | NA        | NA           | NA              |
| CIT     | 0.188     | NA           | 0.943           |
| CKS1B   | 0.673     | NA           | 0.917           |
| CKS2    | 1.818     | 0.334        | 0.869           |
| CSE1L   | 0.475     | 0.567        | 0.722           |
| CTCF    | 0.305     | 0.643        | 0.942           |
| CTPS    | 0.399     | 0.59         | 0.357           |
| DCK     | 0.906     | 0.481        | 0.604           |
| DCLRE1B | 0.527     | 0.503        | 0.706           |

|        |       |       |       |
|--------|-------|-------|-------|
| DCTPP1 | NA    | NA    | NA    |
| DDX39A | 1.528 | 0.543 | 0.639 |
| DEK    | 0.736 | 0.372 | 0.78  |
| DEPDC1 | 0.641 | NA    | 1.159 |
| DIAPH3 | 1.042 | NA    | 0.795 |
| DLGAP5 | 0.343 | NA    | 1.304 |
| DNMT1  | 0.181 | 0.412 | 0.525 |
| DONSON | 0.8   | 0.373 | 0.629 |
| DSCC1  | 0.117 | NA    | 0.397 |
| DUT    | 0.226 | 0.344 | 0.54  |
| E2F    | NA    | NA    | NA    |
| E2F8   | 0.142 | NA    | 0.76  |
| EED    | 1.266 | 0.759 | 0.922 |
| EIF2S1 | 0.723 | 0.857 | 0.818 |
| ESPL1  | NA    | NA    | 0.879 |
| EXOSC8 | 1.558 | 0.515 | 1.034 |
| EZH2   | 4.316 | 0.394 | 0.818 |
| GINS1  | 0.085 | NA    | 0.617 |
| GINS3  | 0.716 | 0.482 | 0.407 |
| GINS4  | 0.679 | 0.499 | 0.567 |
| GSPT1  | 1.737 | 0.779 | 0.729 |
| H2AFX  | NA    | NA    | NA    |
| H2AFZ  | 1.544 | 0.431 | 0.891 |
| HELLS  | 0.314 | NA    | 0.453 |
| HMGA1  | 0.516 | 0.577 | 0.327 |
| HMGB2  | 0.642 | NA    | 1.135 |
| HMGB3  | 1.899 | 0.358 | 1.251 |
| HMMR   | 0.59  | NA    | 1.397 |
| HN1    | 0.449 | 0.694 | 1.267 |
| HNRNPD | 0.46  | 0.556 | 0.876 |
| HUS1   | 0.8   | 1.186 | 1.131 |
| ILF3   | 0.761 | 0.761 | 0.753 |
| ING3   | 0.855 | 0.845 | 0.977 |
| IPO7   | 0.416 | 0.588 | 0.473 |
| KIF18B | 0.07  | NA    | 0.882 |
| KIF22  | NA    | NA    | NA    |
| KIF2C  | 0.422 | 0.301 | 1.198 |
| KIF4A  | 0.144 | NA    | 0.813 |
| KPNA2  | 0.542 | 0.353 | 0.836 |
| LBR    | 1.177 | 0.356 | 0.765 |
| LIG1   | NA    | NA    | NA    |
| LMNB1  | 0.059 | NA    | 0.836 |
| LUC7L3 | 0.824 | 0.701 | 0.945 |
| LYAR   | 0.414 | 0.706 | 0.64  |

|        |       |       |       |
|--------|-------|-------|-------|
| MAD2L1 | 0.366 | NA    | 0.727 |
| MCM2   | 0.274 | 0.385 | 0.402 |
| MCM3   | 0.129 | NA    | 0.376 |
| MCM4   | 0.394 | 0.337 | 0.398 |
| MCM5   | 0.198 | NA    | 0.341 |
| MCM6   | 0.209 | 0.34  | 0.482 |
| MCM7   | 0.291 | 0.337 | 0.365 |
| MELK   | 0.222 | NA    | 0.667 |
| MKI67  | 0.647 | NA    | 0.973 |
| MLH1   | 1.045 | 0.681 | 0.87  |
| MMS22L | NA    | NA    | NA    |
| MRE11A | NA    | 0.485 | 0.577 |
| MSH2   | 0.29  | 0.456 | 0.645 |
| MTHFD2 | 1.29  | 0.671 | 0.928 |
| MXD3   | NA    | NA    | NA    |
| MYBL2  | 0.225 | NA    | 0.437 |
| MYC    | 1.308 | 0.836 | 0.375 |
| NAA38  | 0.535 | 0.733 | 0.94  |
| NAP1L1 | 1.003 | 0.56  | 0.639 |
| NASP   | 0.581 | 0.323 | 0.517 |
| NBN    | 0.311 | 1.009 | 0.895 |
| NCAPD2 | 0.265 | NA    | 0.829 |
| NME1   | 0.587 | 0.53  | 0.639 |
| NOLC1  | 0.461 | 0.567 | 0.336 |
| NOP56  | 0.302 | 0.534 | 0.281 |
| NUDT21 | 0.551 | 0.72  | 1.077 |
| NUP107 | 0.513 | 0.517 | 0.81  |
| NUP153 | 1.149 | 0.465 | 0.597 |
| NUP205 | 0.698 | 0.414 | 0.732 |
| ORC2   | 1.037 | 0.713 | 0.973 |
| ORC6   | 0.472 | NA    | 0.499 |
| PA2G4  | 0.76  | 0.59  | 0.619 |
| PAICS  | 0.686 | 0.522 | 0.973 |
| PAN2   | NA    | NA    | NA    |
| PCNA   | 0.204 | 0.305 | 0.597 |
| PDS5B  | 2.313 | 0.529 | 0.94  |
| PHF5A  | 0.266 | 0.75  | 0.823 |
| PLK1   | 0.206 | 0.426 | 0.895 |
| PLK4   | 0.25  | NA    | 0.82  |
| PMS2   | NA    | NA    | NA    |
| PNN    | 0.596 | 0.526 | 0.629 |
| POLA2  | 0.154 | NA    | 0.454 |
| POLD1  | NA    | NA    | NA    |
| POLD2  | 0.502 | 0.863 | 0.808 |

|          |       |       |       |
|----------|-------|-------|-------|
| POLD3    | 0.134 | 0.373 | 0.608 |
| POLE     | 0.418 | 0.318 | 0.446 |
| POLE4    | 0.348 | 0.826 | 0.814 |
| POP7     | 0.443 | 0.536 | 0.264 |
| PPM1D    | 2.805 | 0.603 | 0.925 |
| PPP1R8   | 0.398 | 1.05  | 1.021 |
| PRDX4    | 0.735 | 0.996 | 1.32  |
| PRIM2    | 0.439 | NA    | 0.505 |
| PRKDC    | 0.253 | 0.56  | 0.481 |
| PRPS1    | 0.924 | 0.529 | 0.439 |
| PSIP1    | 1.661 | 0.435 | 1.075 |
| PSMC3IP  | 0.216 | NA    | 0.456 |
| PTTG1    | 0.59  | 0.305 | 1.031 |
| RACGAP1  | 0.327 | NA    | 0.984 |
| RAD1     | 0.653 | 0.502 | 0.726 |
| RAD21    | 0.979 | 0.397 | 1.147 |
| RAD50    | 0.613 | 0.993 | 1.119 |
| RAD51AP1 | 0.338 | NA    | 0.585 |
| RAD51C   | NA    | NA    | 0.769 |
| RAN      | 1.44  | 0.687 | 0.774 |
| RANBP1   | 0.55  | 0.481 | 0.513 |
| RBBP7    | 1.445 | 0.697 | 0.915 |
| RFC1     | 0.696 | 0.537 | 0.809 |
| RFC2     | 0.578 | 0.356 | 0.608 |
| RFC3     | 0.134 | NA    | 0.469 |
| RNASEH2A | NA    | 0.63  | 0.924 |
| RPA1     | 0.586 | 0.598 | 0.837 |
| RPA2     | 0.37  | 0.51  | 0.756 |
| RPA3     | NA    | NA    | NA    |
| RQCD1    | 0.432 | 0.767 | 0.817 |
| RRM2     | 0.378 | NA    | 0.539 |
| SHMT1    | NA    | NA    | NA    |
| SLBP     | 1.375 | 0.522 | 0.552 |
| SMC1A    | 0.328 | 0.483 | 0.607 |
| SMC3     | 0.483 | 0.39  | 0.943 |
| SMC4     | 0.815 | NA    | 0.958 |
| SMC6     | 0.436 | 0.658 | 0.898 |
| SNRPB    | 0.302 | 0.575 | 0.551 |
| SPAG5    | 0.548 | 0.346 | 1.013 |
| SPC24    | 0.119 | NA    | 0.629 |
| SPC25    | 0.723 | 0.474 | 0.855 |
| SRSF1    | 0.528 | 0.666 | 0.778 |
| SRSF2    | 0.535 | 0.756 | 0.668 |
| SSRP1    | 1.476 | 0.665 | 0.855 |

|          |       |       |       |
|----------|-------|-------|-------|
| STAG1    | 1.123 | 0.579 | 0.85  |
| STMN1    | 0.765 | NA    | 1.04  |
| SUV39H1  | NA    | NA    | 0.585 |
| SYNCRIP  | 0.712 | 0.701 | 0.789 |
| TACC3    | 0.276 | 0.328 | 0.692 |
| TBRG4    | 0.081 | 0.997 | 0.634 |
| TCF19    | NA    | NA    | NA    |
| TFRC     | 0.972 | 0.797 | 0.823 |
| TIMELESS | 0.383 | 0.359 | 0.532 |
| TIPIN    | 0.271 | 0.361 | 0.455 |
| TK1      | 0.176 | NA    | 0.493 |
| TMPO     | 0.291 | NA    | 0.71  |
| TOP2A    | 0.32  | NA    | 1.048 |
| TP53     | NA    | NA    | NA    |
| TRA2B    | 1.716 | 0.685 | 0.797 |
| TRIP13   | 0.449 | 0.387 | 0.687 |
| TUBB     | 0.035 | 0.477 | 0.639 |
| TUBG1    | 0.651 | 0.578 | 0.598 |
| UBE2S    | 0.413 | 0.639 | 0.687 |
| UBE2T    | 0.108 | NA    | 0.663 |
| UBR7     | 1.04  | 0.429 | 0.677 |
| UNG      | 0.342 | 0.405 | 0.382 |
| USP1     | 0.502 | 0.333 | 0.763 |
| WDR90    | NA    | NA    | NA    |
| WEE1     | 0.58  | 0.307 | 0.652 |
| XPO1     | 1.517 | 0.439 | 0.925 |
| XRCC6    | 0.592 | 0.632 | 0.908 |
| ZW10     | 0.902 | 0.901 | 0.896 |
